# Supplementary material for: Randomised controlled trial to determine the efficacy and safety of prescribed water intake to prevent kidney failure due to autosomal dominant polycystic kidney disease (PREVENT-ADPKD)
Source: PubMed Central journal article supplement (PMC5780847; doi:10.1136/bmjopen-2017-018794), 2018-01-21
Supplement: bmjopen-2017-018794.draft_revisions.pdf [file bmjopen-2017-018794.draft_revisions.pdf]

# BMJ Open

BMJ Open is committed to open peer review. As part of this commitment we make the peer review history of every article we publish publicly available.

When an article is published we post the peer reviewers' comments and the authors' responses online. We also post the versions of the paper that were used during peer review. These are the versions that the peer review comments apply to.

The versions of the paper that follow are the versions that were submitted during the peer review process. They are not the versions of record or the final published versions. They should not be cited or distributed as the published version of this manuscript.

BMJ Open is an open access journal and the full, final, typeset and author-corrected version of record of the manuscript is available on our site with no access controls, subscription charges or pay-per-view fees (<http://bmjopen.bmj.com>).

If you have any questions on BMJ Open's open peer review process please email [editorial.bmjopen@bmj.com](mailto:editorial.bmjopen@bmj.com)

# BMJ Open

**The study protocol of a randomised controlled trial to determine efficacy and safety of prescribed water intake to prevent kidney failure due to autosomal dominant polycystic kidney disease (PREVENT-ADPKD)**

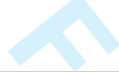

|                               |                                                                                                                                                                                                                                                                                                                                                                                                                                                                                                                                                                                                                                                                                                                                                                                                                                                                                                                                                                                                                                                                                                                                                                                                                                                                                                                                                                                                                                                                                                                                                                                                                                                                                                                                                                                                                                                                                                                                                                                                                                                                                                                                                                                                                     |
|-------------------------------|---------------------------------------------------------------------------------------------------------------------------------------------------------------------------------------------------------------------------------------------------------------------------------------------------------------------------------------------------------------------------------------------------------------------------------------------------------------------------------------------------------------------------------------------------------------------------------------------------------------------------------------------------------------------------------------------------------------------------------------------------------------------------------------------------------------------------------------------------------------------------------------------------------------------------------------------------------------------------------------------------------------------------------------------------------------------------------------------------------------------------------------------------------------------------------------------------------------------------------------------------------------------------------------------------------------------------------------------------------------------------------------------------------------------------------------------------------------------------------------------------------------------------------------------------------------------------------------------------------------------------------------------------------------------------------------------------------------------------------------------------------------------------------------------------------------------------------------------------------------------------------------------------------------------------------------------------------------------------------------------------------------------------------------------------------------------------------------------------------------------------------------------------------------------------------------------------------------------|
| Journal:                      | <i>BMJ Open</i>                                                                                                                                                                                                                                                                                                                                                                                                                                                                                                                                                                                                                                                                                                                                                                                                                                                                                                                                                                                                                                                                                                                                                                                                                                                                                                                                                                                                                                                                                                                                                                                                                                                                                                                                                                                                                                                                                                                                                                                                                                                                                                                                                                                                     |
| Manuscript ID                 | bmjopen-2017-018794                                                                                                                                                                                                                                                                                                                                                                                                                                                                                                                                                                                                                                                                                                                                                                                                                                                                                                                                                                                                                                                                                                                                                                                                                                                                                                                                                                                                                                                                                                                                                                                                                                                                                                                                                                                                                                                                                                                                                                                                                                                                                                                                                                                                 |
| Article Type:                 | Protocol                                                                                                                                                                                                                                                                                                                                                                                                                                                                                                                                                                                                                                                                                                                                                                                                                                                                                                                                                                                                                                                                                                                                                                                                                                                                                                                                                                                                                                                                                                                                                                                                                                                                                                                                                                                                                                                                                                                                                                                                                                                                                                                                                                                                            |
| Date Submitted by the Author: | 26-Jul-2017                                                                                                                                                                                                                                                                                                                                                                                                                                                                                                                                                                                                                                                                                                                                                                                                                                                                                                                                                                                                                                                                                                                                                                                                                                                                                                                                                                                                                                                                                                                                                                                                                                                                                                                                                                                                                                                                                                                                                                                                                                                                                                                                                                                                         |
| Complete List of Authors:     | <p>Wong, Annette; The Westmead Institute for Medical Research, Centre for Transplant and Renal Research<br/> Mannix, Carly; The Westmead Institute for Medical Research, Centre for Transplant and Renal Research<br/> Grantham, Jared; University of Kansas Medical Center<br/> Allman-Farinelli, Margaret; University of Sydney, School of Life and Environmental Sciences<br/> Badve, Sunil; St. George Hospital, Department of Nephrology<br/> Boudville, Neil; Sir Charles Gairdner Hospital<br/> Byth, Karen; NHMRC Clinical Trials Centre, University of Sydney and WSLHD Research and Education Network<br/> Chan, Jessie; McCloud Consulting Group, Biostatistics and Data Management<br/> Coulshed, Susan; North Shore Nephrology<br/> Edwards, Marie; Mayo Clinic, Translational Polycystic Kidney Disease Center<br/> Erickson, Bradley; Mayo Clinic, Translational Polycystic Kidney Disease Center<br/> Foster, Sheryl; Westmead Hospital, Department of Radiology; The University of Sydney, Faculty of Health Sciences<br/> Haloob, Imad; Bathurst Base Hospital, Department of Renal Medicine<br/> Harris, David; The Westmead Institute for Medical Research, Centre for Transplant and Renal Research; Westmead Hospital, Department of Renal Medicine<br/> Hawley, Carmel; University of Queensland at Princess Alexandra Hospital, Australasian Kidney Trials Network<br/> Hill, Julie; McCloud Consulting Group, Biostatistics and Data Management<br/> Howard, Kirsten; University of Sydney, School of Public Health<br/> Jiang, Simon; Canberra Hospital, Department of Renal Medicine; Australian National University, Department of Immunology and Infectious Diseases<br/> Johnson, David; University of Queensland at Princess Alexandra Hospital, Australasian Kidney Trials Network<br/> Kline, Timothy; Mayo Clinic, Translational Polycystic Kidney Disease Center<br/> Lee, Vincent; Westmead Hospital, Department of Renal Medicine; The Westmead Institute for Medical Research, Centre for Transplant and Renal Research<br/> Mai, Jun; Liverpool Hospital, Department of Renal Medicine<br/> McCloud, Philip; McCloud Consulting Group, Biostatistics and Data Management</p> |

|                                 |                                                                                                                                                                                                                                                                                                                                                                                                                                                                                                                                                                                                                                                                                 |
|---------------------------------|---------------------------------------------------------------------------------------------------------------------------------------------------------------------------------------------------------------------------------------------------------------------------------------------------------------------------------------------------------------------------------------------------------------------------------------------------------------------------------------------------------------------------------------------------------------------------------------------------------------------------------------------------------------------------------|
|                                 | <p>Peduto, Anthony; University of Sydney, Faculty of Health Sciences<br/> Rangan, Anna; University of Sydney, School of Life and Environmental Sciences<br/> Roger, Simon; Gosford Renal Research<br/> Sud, Kamal; The Westmead Institute for Medical Research, Centre for Transplant and Renal Research; Nepean Hospital, Department of Renal Medicine<br/> Torres, Vincent; Mayo Clinic, Translational Polycystic Kidney Disease Centre<br/> Vliayuri, Eswari; John Hunter Hospital, Department of Nephrology<br/> Rangan, Gopala; The Westmead Institute for Medical Research, Centre for Transplant and Renal Research; Westmead Hospital, Department of Renal Medicine</p> |
| <b>Primary Subject Heading</b>: | Renal medicine                                                                                                                                                                                                                                                                                                                                                                                                                                                                                                                                                                                                                                                                  |
| Secondary Subject Heading:      | Nutrition and metabolism                                                                                                                                                                                                                                                                                                                                                                                                                                                                                                                                                                                                                                                        |
| Keywords:                       | Chronic renal failure < NEPHROLOGY, Adult nephrology < NEPHROLOGY, Magnetic resonance imaging < RADIOLOGY & IMAGING                                                                                                                                                                                                                                                                                                                                                                                                                                                                                                                                                             |
|                                 |                                                                                                                                                                                                                                                                                                                                                                                                                                                                                                                                                                                                                                                                                 |

SCHOLARONE™  
Manuscripts

review only

1  
2  
3 The study protocol of a randomised controlled trial to determine efficacy and safety of  
4 prescribed water intake to prevent kidney failure due to autosomal dominant  
5 polycystic kidney disease (PREVENT-ADPKD)  
6  
7  
8  
9

10  
11 Authors: Annette Wong<sup>1</sup>, Carly Mannix<sup>1</sup>, Jared J. Grantham<sup>2</sup>, Margaret Allman-  
12 Farinelli<sup>3</sup>, Sunil V. Badve<sup>4</sup>, Neil Boudville<sup>5</sup>, Karen Byth<sup>6</sup>, Jessie Chan<sup>7</sup>, Susan  
13 Coulshed<sup>8</sup>, Marie E. Edwards<sup>9</sup>, Bradley Erickson<sup>9</sup>, Sheryl Foster<sup>10,11</sup>, Imad Haloob<sup>12</sup>,  
14 David C.H. Harris<sup>1,13</sup>, Carmel M. Hawley<sup>14</sup>, Julie Hill<sup>7</sup>, Kirsten Howard<sup>15</sup>, Simon H.  
15 Jiang<sup>16,17</sup>, David W. Johnson<sup>14</sup>, Timothy L. Kline<sup>9</sup>, Vincent W. Lee<sup>1,13</sup>, Jun Mai<sup>18</sup>,  
16 Philip McCloud<sup>7</sup>, Anthony Peduto<sup>11</sup>, Anna Rangan<sup>3</sup>, Simon D. Roger<sup>19</sup>, Kamal  
17 Sud<sup>1,20</sup>, Vicente Torres<sup>8</sup>, Eswari Vliayuri<sup>21</sup>, Gopala K. Rangan<sup>1,11</sup>  
18  
19  
20  
21  
22  
23  
24  
25  
26  
27  
28

29  
30 <sup>1</sup>Centre for Transplant and Renal Research, Westmead Institute for Medical Research,  
31 The University of Sydney, Westmead, NSW, Australia;  
32

33  
34 <sup>2</sup>Kansas University Medical Center, Kansas City, Kansas, USA;  
35

36  
37 <sup>3</sup>School of Life and Environmental Sciences, The University of Sydney, Sydney,  
38 NSW, Australia  
39

40  
41 <sup>4</sup>St George Hospital, Kogarah, NSW, Australia  
42

43  
44 <sup>5</sup>Sir Charles Gairdner Hospital, Nedlands, WA, Australia  
45

46  
47 <sup>6</sup>Research and Education Network, Westmead Hospital, Western Sydney Local  
48 Health District, Westmead, NSW, Australia;  
49

50  
51 <sup>7</sup>McCloud Consulting Group, Gordon, NSW, Australia.  
52

53  
54 <sup>8</sup>North Shore Nephrology, Crows Nest, NSW, Australia  
55

56  
57 <sup>9</sup>Translational Polycystic Kidney Disease Center, Mayo Clinic, Rochester, Minnesota,  
58 USA;  
59  
60

1  
2  
3 <sup>10</sup>Department of Radiology, Westmead Hospital, Western Sydney Local Health  
4  
5 District, Westmead, NSW, Australia;

6  
7 <sup>11</sup>Faculty of Health Sciences, The University of Sydney, Sydney, NSW, Australia;

8  
9 <sup>12</sup>Department of Renal Medicine, Bathurst Hospital, Bathurst, NSW, Australia

10  
11 <sup>13</sup>Department of Renal Medicine, Westmead Hospital, Western Sydney Local Health  
12  
13 District, Westmead, NSW, Australia;

14  
15 <sup>14</sup>Australasian Kidney Trials Network, University of Queensland at Princess  
16  
17 Alexandra Hospital, Woolloongabba, Queensland, Australia;

18  
19 <sup>15</sup>School of Public Health, The University of Sydney, Sydney, NSW, Australia;

20  
21 <sup>16</sup>Department of Renal Medicine, Canberra Hospital, Garran, ACT, Australia

22  
23 <sup>17</sup>Department of Immunology and Infectious Diseases, John Curtin School of Medical  
24  
25 Research, Australian National University, ACT

26  
27 <sup>18</sup>Department of Renal Medicine, Liverpool Hospital, Southwestern Sydney Local  
28  
29 Health District, Liverpool, NSW, Australia;

30  
31 <sup>19</sup>Renal Research, Gosford, NSW, Australia;

32  
33 <sup>20</sup>Department of Renal Medicine, Nepean Hospital, Sydney, Australia

34  
35 <sup>21</sup>Department of Nephrology, John Hunter Hospital, Newcastle, NSW, Australia

36  
37  
38  
39  
40  
41  
42  
43 Author for correspondence:

44  
45 Dr. G. Rangan Westmead Institute for Medical Research, Level 5, Centre for  
46  
47 Transplant and Renal Research, 176 Hawkesbury Road (PO Box 412), Westmead,

48  
49 NSW 2145 AUSTRALIA. Phone: 61-2 8627 3502 Fax: 61-2 9475

50  
51 1146

52  
53 Email: [g.rangan@sydney.edu.au](mailto:g.rangan@sydney.edu.au)

1  
2  
3 Word count: 4944  
4

5 **ABSTRACT**  
6

7 **Introduction:** Maintaining fluid intake sufficient to reduce arginine vasopressin  
8 (AVP) secretion may slow kidney cyst growth in autosomal dominant polycystic  
9 kidney disease (ADPKD). The aim of this study is to determine the long-term efficacy  
10 and safety of prescribed water intake to reduce the progression of height-adjusted  
11 total kidney volume (ht-TKV) due to ADPKD.  
12  
13

14 **Methods and analysis:** This is a multi-centre, prospective, parallel group, open-label,  
15 randomised controlled trial. Patients with ADPKD (n=180; age≤65 years, estimated  
16 glomerular filtration rate (eGFR) ≥30 ml/min/1.73m<sup>2</sup>) will be randomised (1:1) to  
17 either the Control (standard treatment + usual fluid intake) or Intervention (standard  
18 treatment + prescribed fluid intake) group. Participants in the Intervention arm will be  
19 prescribed an individualised daily fluid intake to reduce urine osmolality to ≤270  
20 mosmol/kg, and supported with structured clinic and telephonic dietetic review, self-  
21 monitoring of urine specific gravity (USG), short message service (SMS) text  
22 reminders and internet-based tools. All participants will have 6-monthly follow-up  
23 visits, and ht-TKV will be measured by magnetic resonance imaging (MRI) at 0, 18  
24 and 36 months. The primary endpoint is the annual rate of change in ht-TKV as  
25 determined by serial renal MRI in Control vs. Intervention groups, from baseline to 3  
26 years. The secondary endpoints are differences between the two groups in systemic  
27 AVP activity, renal disease (eGFR, blood pressure, renal pain), patient adherence,  
28 acceptability and safety.  
29  
30  
31  
32  
33  
34  
35  
36  
37  
38  
39  
40  
41  
42  
43  
44  
45  
46  
47  
48  
49  
50

51 **Ethics and Dissemination:** The trial was approved by the Human Research Ethics  
52 Committee, Western Sydney Local Health District. The results will inform clinicians,  
53 patients and policymakers regarding the long-term safety, efficacy and feasibility of  
54  
55  
56  
57  
58  
59  
60

1  
2  
3 prescribed fluid intake as an approach to reduce kidney cyst growth in patients with  
4  
5 ADPKD.  
6

7 **Trial Registration:** The trial is registered with the Australian New Zealand Clinical  
8  
9 Trials Registry (number 1261-4001-216-606) and endorsed by the Scientific  
10  
11 Committee of the Australasian Kidney Trials Network (AKTN).  
12  
13

## 14 15 16 **STRENGTHS AND LIMITATIONS**

- 17  
18 • A long-term RCT on water intake is a key research priority in ADPKD.  
19  
20 Evidence to support increased fluid intake as a recommendation in the clinical  
21  
22 management of ADPKD is limited. Consequently, evidence-based Clinical  
23  
24 Practice Guidelines do not include recommendations to increase water intake in  
25  
26 ADPKD, and the matter remains extremely controversial in clinical practice and  
27  
28 confusing to consumers. This study will provide the first high level evidence  
29  
30 regarding the *long-term efficacy* of prescribed water intake on the progression of  
31  
32 ADPKD.  
33  
34
- 35  
36 • A major strength of the trial is the duration of follow-up and the use of Ht-  
37  
38 TKV as the primary endpoint which will provide the definitive evidence required  
39  
40 by consumers and clinicians.  
41  
42
- 43  
44 • In addition, the study intervention will be implemented using a multi-  
45  
46 pronged approach using self-monitoring, dietetic intervention and mobile-phone  
47  
48 technology.  
49
- 50  
51 • The potential limitations of the study are that the trial intervention is unblinded  
52  
53 and is reliant on the behavioural change to drinking habits of the participant.  
54  
55  
56  
57  
58  
59  
60

## INTRODUCTION

Autosomal dominant polycystic kidney disease (ADPKD) is the most common genetic kidney disease in adults, affecting one in every 2500 individuals, and the cause of kidney failure in 5-10% of the dialysis population worldwide.[1] It is due to heterozygous germ-line mutations in *PKD1* (85%) or *PKD2* (15%) which encode the transmembrane protein polycystin-1 and calcium ion channel polycystin-2 respectively.[1] These proteins maintain the differentiated structure of the distal nephron during health and disease.[1] The clinical hallmark of ADPKD is the presence of numerous distal nephron-derived cysts in the kidney, which form in early childhood and grow by 5-10% per year such that by mid-life the kidney is about five times larger than normal (1.0 kg vs 0.2 kg),[2] causing chronic pain and hypertension. The expanding cysts also compress healthy kidney tissue, leading to progressive chronic kidney disease (CKD) and renal replacement therapy in ~50% of affected people by age of 60.[3] Currently there is no 'cure' for ADPKD, and the ideal therapy to stop kidney cyst growth and prevent end stage kidney disease (ESKD) will be one with few side effects, as it will need to be taken lifelong.[4]

Arginine vasopressin (AVP) is a posterior pituitary hormone with a recognised physiological role in maintaining water homeostasis.[5] It is released in response to hypovolaemia and hyperosmolality, and binds to  $V_2$  receptors on the principal cells of the collecting duct in the kidney, causing reabsorption of water from the tubular lumen.[5] Renal cysts are derived from the principal cells of the collecting duct of the nephron.[6,7] However, the epithelial cells lining the cysts respond abnormally to



1  
2  
3 AVP by activating intracellular cyclic adenosine monophosphate (cAMP) signalling  
4 which stimulates proliferation and luminal fluid secretion, causing cyst growth. In  
5 rats, the congenital deficiency of AVP completely abrogated renal cyst formation and  
6 growth,[8] providing compelling evidence that AVP has a critical role in cystogenesis  
7 and that its inhibition at an early stage of disease could markedly reduce the risk of  
8 developing ESKD in ADPKD. In this regard, small-molecule vasopressin-receptor  
9 antagonists have been shown to be highly effective in reducing cyst growth in  
10 preclinical studies,[9] and in humans, a randomised controlled trial showed that three  
11 years of treatment with tolvaptan (a highly specific vasopressin-receptor antagonist)  
12 in early-stages of ADPKD reduced the rate of increase in total kidney volume (TKV)  
13 by 50%, attenuated the decline in estimated glomerular filtration rate (eGFR) by 30%,  
14 and reduced chronic kidney pain.[10]

15  
16  
17  
18  
19  
20  
21  
22  
23  
24  
25  
26  
27  
28  
29  
30 For several years, it has been suggested that the suppression of vasopressin by  
31 increasing fluid intake could also slow renal cyst growth in ADPKD.[7,11] In support  
32 of the hypothesis, preclinical experiments in the *pck* rat model of PKD showed that  
33 increased water intake reduced kidney enlargement [12,13], and comparison with  
34 separate studies imply that the efficacy might be similar (but with physiological  
35 differences) to vasopressin receptor antagonists.[14] However, whether this  
36 hypothesis is also true in humans with ADPKD remains unknown. The data available  
37 is limited to a single post-hoc analytical study,[15] two short-term interventional trials  
38 (< 1 week in duration) without control groups,[16,17] and a single, small, quasi-  
39 randomised observational cohort study of twelve months duration which  
40 paradoxically suggested that increased fluid intake increases renal cyst growth.[18]  
41  
42  
43  
44  
45  
46  
47  
48  
49  
50  
51  
52  
53  
54  
55  
56  
57  
58  
59  
60  
Consequently, evidence-based clinical care guidelines have not included  
recommendations to increase fluid intake in ADPKD patients and the matter remains

1  
2  
3 controversial in clinical practice.[19] Consistent with this view, ADPKD patients  
4  
5 attending a consumer workshop also stated that the role of fluid intake was an  
6  
7 ambiguous area that needed urgent prioritisation in clinical research.[20] An  
8  
9 illustrative comment made by a workshop participant was: “*there needs to be*  
10  
11 *consistency of what doctors say about drinking less or drinking more*”. [20]  
12  
13

14  
15 Two recent clinical studies reported that prescribed fluid intake could be  
16  
17 achieved over a period of 2-4 weeks in ADPKD patients.[21,22] In addition, two  
18  
19 randomised controlled trials are presently underway to address the role of fluid intake  
20  
21 in ADPKD and CKD over a longer duration.[23,24] However, neither of these studies  
22  
23 will specifically address the long-term efficacy of fluid intake on renal cyst growth in  
24  
25 ADPKD. Hence, the aim of the current study is to determine the efficacy and safety of  
26  
27 prescribed water intake to *prevent* the progression of TKV in chronic kidney disease  
28  
29 (CKD, Stages 1-3) due to ADPKD (PREVENT-ADPKD) over a 3-year period. The  
30  
31 trial commenced study activity in 2015 and as of July 2017 75% of the planned target  
32  
33 recruitment has been attained. The current paper provides a summary of the clinical  
34  
35 trial protocol  
36  
37  
38  
39  
40

## 41 **METHODS AND ANALYSIS**

### 42 **Participants, design and registration**

43  
44 This is a prospective, parallel-group, open-label, multicentre randomised  
45  
46 controlled trial which will enrol 180 participants that meet the inclusion criteria  
47  
48 (Table 1). The planned recruitment period is up to 1.8 years, and began at Westmead  
49  
50 Hospital in December 2015. For participants, the duration of the trial is 3.2 years,  
51  
52 including the Screening Visit and the Run-in, Treatment and Post-Treatment periods  
53  
54 (Figure 1). The trial is registered (Australian New Zealand Clinical Trials Registry  
55  
56  
57  
58  
59  
60

number 1261-4001-216-606) and will be conducted according to Good Clinical Practice and reported using Consolidated Standards of Reporting Trials (CONSORT) guidelines.[25]

**Table 1.** Inclusion and Exclusion criteria

| <b>Inclusion criteria</b> |                                                                                                      |
|---------------------------|------------------------------------------------------------------------------------------------------|
| 1.                        | Adult patients providing informed consent, aged 18 to 65 years of age                                |
| 2.                        | Diagnosis of ADPKD, such as meeting the Pei-Ravine criteria [26]                                     |
| 3.                        | eGFR (CKD-EPI) $\geq 30$ mL/min/1.73 m <sup>2</sup> within 6 weeks of randomisation                  |
| <b>Exclusion criteria</b> |                                                                                                      |
| 1.                        | Safety risk (e.g. serum Na <sup>+</sup> < 135 mmol/L; use of drugs with high-risk for hyponatraemia) |
| 2.                        | Contraindication to or interference with MRI assessments                                             |
| 3.                        | Risk of non-compliance with trial procedures                                                         |
| 4.                        | Concomitant conditions or treatments likely to confound endpoint assessments                         |
| 5.                        | Participation in other clinical trials to slow ADPKD or CKD                                          |
| 6.                        | TKV Mayo Clinic Subclass 1A on screening (low risk of progression) [27]                              |

### Recruitment

Multiple strategies will be used to facilitate recruitment.[28,29] Participants will be identified from nephrologists practicing at the study centres (see below), either through direct referral to the study team (email or verbal communication) or review of clinic letters and (if available) local databases. This approach will be supplemented with presentations at the study centres and adjacent hospitals (Royal North Shore

1  
2  
3 Hospital, Concord Hospital, Wollongong Hospital, and Prince of Wales Hospital). In  
4  
5 addition, participants will also be recruited passively through the internet, digital and  
6  
7 print media advertising (listing on the websites of the PKD Foundation of Australia,  
8  
9 the Australasian Kidney Trials Network, Clinical Trials Connect and the University of  
10  
11 Sydney; letters to Australian nephrologists, news items in the e-bulletins of Australian  
12  
13 and New Zealand Society of Nephrology; newspaper advertisements; flyers placed in  
14  
15 Renal Clinic waiting rooms in Sydney Hospitals). All identified and interested  
16  
17 participants will be discussed with the treating nephrologist for their suitability and  
18  
19 pre-screened by telephone to tentatively determine their eligibility and verified using  
20  
21 previous imaging and eGFR reports, prior to arranging their study visit.  
22  
23  
24  
25  
26

### 27 **Study Centres**

28  
29 The study centres will consist of a combination of University Teaching  
30  
31 Hospitals, Medical Research Institutes and Private Consulting Rooms to facilitate the  
32  
33 participants' ability to be involved in the trial. The centres will be in Sydney  
34  
35 (Westmead Institute for Medical Research, Westmead Hospital, Nepean Hospital,  
36  
37 Norwest Hospital, Liverpool Hospital, St George Hospital, Prince of Wales Hospital,  
38  
39 Mater Private Rooms), NSW Central Coast (Gosford Renal Research, Gosford  
40  
41 Nephrology), Newcastle (John Hunter Hospital), Wollongong (Wollongong Hospital),  
42  
43 Perth (Sir Charles Gairdner Hospital), Central Sydney (Barangaroo) and Canberra  
44  
45 (Canberra Hospital).  
46  
47  
48  
49  
50  
51

### 52 **Mobile Study Team**

53  
54 To enhance the efficiency of the trial and minimise its impact on the local  
55  
56 resources of the study centres, a mobile study team [30] (based at the Westmead  
57  
58  
59  
60

1  
2  
3 Institute for Medical Research and Westmead Hospital) consisting of research  
4 dietitians and a nephrologist, will visit the study centres to conduct research activity.  
5

6  
7 The mobile study team will see several participants on the designated day of the visit,  
8 and be supported by local clinical research staff by provision of space and  
9 undertaking minor procedures such as blood collection.  
10  
11  
12

### 13 14 15 16 **Study Visits** (see Figure 1)

- 17  
18  
19 1. *Screening Visit (up to Month -1.5)*. If a patient meets all inclusion criteria  
20 and no exclusion criteria, he or she will be enrolled in the trial. At this visit,  
21 participants will have their medical and ADPKD history reviewed, usual  
22 fluid intake and kidney pain (using the HALT-PKD questionnaire) [31]  
23 assessed. A venous blood sample and spot urine sample will also be  
24 collected for DNA analysis and biomarker assessment (see below).  
25  
26 Participants will then be asked to have two 24-hour urine collections and  
27 blood tests (for testing baseline electrolytes, eGFR and osmolality) as an  
28 outpatient at a local pathology collection centre, and a renal MRI (to assess  
29 baseline TKV) will be performed. The period from Screening to  
30 Randomisation Visits (up to 12 weeks) will serve as the run-in period to  
31 confirm the participant's willingness to adhere to study procedures.  
32  
33  
34  
35  
36  
37  
38  
39  
40  
41  
42  
43  
44

- 45  
46  
47 2. *Randomisation and Baseline Visit (Month 0)*. Follow-up medical and  
48 ADPKD histories will be taken and venous blood and urine samples will be  
49 collected at this visit. Participants randomised to the Control Group will  
50 continue with their usual (*ad libitum*) water intake and standard treatment.  
51  
52 Participants in the Intervention Group will be advised to adjust their daily  
53  
54  
55  
56  
57  
58  
59  
60

1  
2  
3 water intake for the next 36 months, in addition to continuation of their  
4 standard treatment, and be provided with specific instructions, described in  
5 the section under *Study Intervention (Group B)*.  
6  
7  
8  
9

- 10  
11  
12 3. *Treatment Period.* The 3-year treatment period includes repeat outpatient  
13 blood and 24-hour urine collections (at 3-monthly intervals in Year 1 and 6-  
14 monthly in Years 2–3), progress MRI scans (at 18 and 36 months) and  
15 visits to the study centre every 6 months.  
16  
17  
18  
19  
20  
21  
22  
23 4. *Follow-up Study Visits (Months 6, 12, 18, 24, 30 and 36).* Progress medical  
24 and ADPKD histories and further collections of venous blood and urine  
25 will be undertaken at follow-up study visits. Study staff will record  
26 answers to specific questions on adverse events (AEs) and kidney pain  
27 (using the HALT-PKD questionnaire). At the Final Treatment Visit at  
28 Month 36, Intervention Group participants will be advised that they may  
29 return to their previous *ad libitum* water intake.  
30  
31  
32  
33  
34  
35  
36  
37  
38  
39  
40  
41 5. *Post-treatment Study Visit.* This will occur at Month 37 for all participants.  
42  
43  
44  
45  
46  
47  
48  
49  
50  
51

## 52 **Randomisation Procedure**

53  
54 Participants will be randomly allocated in a 1:1 ratio (in permuted blocks of  
55 4) to the Control Group or the Intervention Group, stratified by baseline eGFR (< 60  
56  
57  
58  
59  
60

1  
2  
3 or  $\geq 60$  mL/min/1.73m<sup>2</sup>). Randomisation and concealed allocation will be performed  
4  
5 with a secure, web-based randomisation service (Randomize.net). The trial  
6  
7 statisticians have generated a validated randomisation list.  
8  
9

### 10 **Study Intervention (Group B)**

11  
12 At the Randomisation/Baseline Visit (Month 0, see Figure 1), the Study Dietitian will  
13  
14 implement the following:  
15

- 16  
17 1. *Calculation of Fluid Prescription.* Participants will be advised to drink a  
18  
19 prescribed volume of fluid per day (preferably tap water), based on the free  
20  
21 water clearance formula, to reduce their urine osmolality to  
22  
23  $\leq 270$  mosmol/L plus an amount to account for insensible losses  
24  
25 (appropriate for climate and daily activity).[32,33] The calculation is as  
26  
27 follows:  
28  
29  
30  
31  
32

$$\text{Prescribed Fluid Intake (mL)} = \frac{\text{total solutes (mosmol)} (\text{mL}) + \text{insensible losses (mL)}}{270} [17]$$

36  
37

38  
39 *Total solutes (urine osmolality  $\times$  urine volume [mL]) is the mean derived from two 24-hour urine*  
40  
41 *samples collected between the Screening Visit and the Randomisation/Baseline Visit.*  
42

- 43  
44  
45  
46 2. *Dietary counselling.* A high dietary solute load (due to high salt and protein  
47  
48 intakes) requires a higher fluid intake to maintain urine dilution.[11]  
49  
50 Participants will be educated about the importance of dietary solute intake  
51  
52 in determining obligatory urine volume (i.e. the minimum urine volume  
53  
54 required to excrete the daily solute load).[34] The Study Dietitian will take  
55  
56 a detailed diet history and provide tailored dietary advice to enable  
57  
58  
59  
60

1  
2  
3 participants to achieve and maintain a moderate protein intake (0.75–  
4 1.0 g/kg/day) and limit sodium intake to 80-100 mmol/day.[19] If the  
5  
6  
7 calculated prescription is more than 3L per day, the participant will be  
8  
9  
10 advised to gradually increase fluid intake until target urine osmolality is  
11  
12 reached and focus on reducing dietary solutes to reduce the risk of  
13  
14 hyponatraemia

- 15  
16 3. *Review of Lifestyle and Environmental Factors.* The participant's lifestyle,  
17  
18 personal preferences and occupation will be recorded and reviewed when  
19  
20 providing individualised techniques for promoting adherence to fluid  
21  
22 intake. Participants will be provided with 3 × 1 L re-usable water bottles to  
23  
24 help keep track of their fluid intake, and will be encouraged to drink evenly  
25  
26 throughout the day and replenish with each episode of nocturia.  
27  
28  
29 4. *Self-Monitoring of Fluid Intake and Treatment Efficacy.* Aids have been  
30  
31 developed to assist participants with self-monitoring, including a paper-  
32  
33 based diary or web-based/smartphone compatible tool to self-monitor fluid  
34  
35 intake, and urine dipsticks will be provided to record urine specific gravity  
36  
37 (USG). Participants will be shown how to read their USG and will be asked  
38  
39 to test it during the late afternoon (4–8 pm) at least once daily in the first 2  
40  
41 weeks of the study, at least twice weekly for the first 6 months and then at  
42  
43 least monthly for the duration of the study. A USG of  $\leq 1.010$  indicates a  
44  
45 spot urine osmolality of  $\leq 270$  mmol/L, meaning that fluid intake in the  
46  
47 past few hours has been adequate. Participants will also be briefed on  
48  
49 receiving and responding to short message service (SMS) text messages (or  
50  
51 emails if they do not own a mobile phone) requesting the results of a late  
52  
53 afternoon USG measurement (see below), as well as on the schedule of  
54  
55  
56  
57  
58  
59  
60



1  
2  
3 telephone calls (see below).  
4

5 5. *Scheduled Telephone Calls and Follow-up Study visits.* Participants in the  
6 Intervention Group will be contacted by telephone (at Weeks 1, 3 and 6,  
7 then monthly in Year 1, and 3-monthly for Years 2–3) and reviewed face-  
8 to-face at all study visits by the Study Dietitian to assess compliance with  
9 fluid intake, discuss USG results, ensure that blood and urine samples are  
10 collected and to record any AEs and new medications commenced. If  
11 necessary, the fluid prescription will be adjusted depending on the results  
12 of progress 24-hour urine osmolality and USG. The Study Dietitian will  
13 monitor compliance with protein and sodium recommendations using 24-  
14 hour recalls at all study visits.  
15  
16  
17  
18  
19  
20  
21  
22  
23  
24  
25  
26

27 6. *Response to SMS Text Messages.* To provide a quantitative measure of  
28 adherence, participants in the Intervention Group will be required to reply  
29 (within 12 hours) to an SMS message requesting the results of a late  
30 afternoon USG. The SMS message will be delivered twice a week in  
31 Months 0–6, then monthly for the duration of the study.  
32  
33  
34  
35  
36  
37

38 7. *Rationale for the Intervention.* Previous trials in patients with recurrent  
39 nephrolithiasis in Italy and Israel have shown that a long-term increase in  
40 fluid intake can be achieved with targeted education provided at clinic  
41 visits alone [35,36] but, for the current study in Australia, telephone  
42 coaching by a dietitian and the above tools are included to boost  
43 compliance and continued participation.[37] A systematic review revealed  
44 that self-monitoring of USG is a critical tool to enhance the implementation  
45 of increased fluid intake in clinical trials.[38] SMS texting is a method  
46 preferred by consumers in health interventions.  
47  
48  
49  
50  
51  
52  
53  
54  
55  
56  
57  
58  
59  
60

## Standard Treatment

Both study groups will continue to receive the current standard of care for ADPKD as specified by the treating nephrologist. Hypertension will be treated with angiotensin-converting enzyme inhibitors or angiotensin receptor blockers as first line agents. If hypertension remains inadequately controlled, use of additional antihypertensive agents will be at the discretion of the treating nephrologist, but treatment with diuretics will be contraindicated. The frequency of study visits in the trial is similar to standard nephrological care in ADPKD with CKD stages 1-3.

## Primary Endpoint

The primary endpoint is the percentage annual change in ht-TKV from baseline to 36 months. Dialysis-dependent kidney failure takes decades to develop in ADPKD, making it impractical to use serial changes in serum creatinine and eGFR for assessing treatment efficacy. Ht-TKV is a highly sensitive surrogate marker that measures exponential cyst growth, the key parameter of ADPKD progression, and has been used as a primary endpoint in many pivotal clinical trials. The longitudinal Consortium for Radiologic Imaging Studies of PKD (CRISP-I) study established that the rate of increase in TKV is relatively constant (~5.6%/year) and can be quantified with high precision by MRI (reliability coefficient, 0.998; mean coefficient of variation, 0.01%).<sup>[2]</sup> In CRISP-II, adjusting for height reduced variability in TKV, and a baseline ht-TKV value of >600 mL/m predicted development of CKD Stage 3 over an 8-year period (AUC = 0.84; sensitivity, 74%; specificity, 75%).<sup>[39]</sup> The magnitude of the rate of increase in ht-TKV predicted the risk of ESKD.

## Secondary Endpoints

1. *Systemic AVP activity*. Markers will be serum copeptin,[5,24] 24-hour urine osmolality and volume;
2. *Kidney Disease Progression*. Markers will be rate of eGFR decline (0 and 3 to 36+ Months); resting mean arterial pressure; urine albumin:creatinine ratio; and kidney pain as assessed by the HALT-PKD questionnaire;
3. *Treatment Adherence*. Measured by proportion of the Intervention Group responding within 12 hours to SMS texts requesting results of the late afternoon USG; proportion of the Intervention Group with 24-hr urine osmolality  $\leq 270$  mosmol/L;
4. *Safety Endpoints*. Measured by proportion of participants with serum Na  $< 130$  mmol/L; episodes of serious AEs;
5. *Patient Acceptability*. Measured by a Treatment Acceptability questionnaire and the proportion of participants withdrawing from the study;
6. *Quality of Life*. Measured by the Kidney Disease Quality of Life short form (KDQOL-SF) 1.3 tool;
7. *Healthcare utilisation*. At each study visit participants are asked if they have had any new diagnosis, hospital visits, seen a GP or changed medication since the previous visit.

Study endpoints were developed to ensure that appropriate health economic analyses can be undertaken at the conclusion of the trial. Future linkage with the Australian and New Zealand Dialysis and Transplant (ANZDATA) Registry will enable long-term outcomes (e.g. time to reach ESKD) to be determined with minimal cost.

## Study Measurements (see table 2)

1. *Height-adjusted total kidney volume (Ht-TKV)*. Renal MRI will be performed three times (at baseline and at Months 18 and 36) during the study to assess the annual rate of change in ht-TKV in the study groups. MRIs will be performed in the radiology departments of the respective study centres, using a standardised protocol,[10] after the MRI protocol and image quality has been validated.[10] The MRI scans will be de-identified and encrypted, then analysed at the Translational PKD Centre at Mayo Clinic, Rochester, Minnesota (USA) by blinded personnel to quantify TKV. Baseline TKV for each patient will be determined by performing kidney segmentation semi-automatically on the T2-weighted MRI utilizing the MIROS software package. This algorithm outputs a complete segmentation after the user quickly defines crude polygon contours of each kidney every third slice.[40] The interactive toolkit included in the package is then used to perform quality assurance and finalize the segmentation on each baseline image. Thereafter, TKV will be measured in all follow-up T2-weighted MRI scans using an automated registration-based segmentation technique, as validated previously.[41] A final quality control check will also be performed on these follow-up scans using the interactive toolkit. Finally, fractional cyst volume will be calculated using an automated cyst segmentation technique along with a final quality check.
2. *Serum and urine electrolytes, creatinine and osmolality*. Outpatient serum and 24-hour urine will be collected at baseline and at Months 3, 6, 9, 12, 18, 24, 30 and 36 for measuring electrolytes, creatinine, urea, urate and

1  
2  
3 osmolality. In participants from the Intervention Group, additional samples  
4  
5 will be collected at Weeks 3 and 6 for an initial safety check (for  
6  
7 hyponatraemia) and for titration of the water prescription. Following the  
8  
9 Last Treatment Visit (Month 36), blood tests will be performed 2 and 4  
10  
11 weeks later and a 24-hour urine collection will be performed 4 weeks later,  
12  
13  
14 in all groups.

- 15  
16 3. *Systemic AVP activity.* Venous blood will be collected at all study visits to  
17  
18 measure serum copeptin (a pre-pro-hormone that is a stable biomarker for  
19  
20 AVP). Longitudinal studies show that serum copeptin is a determinant of  
21  
22 TKV and eGFR decline in ADPKD[42,43] consistent with the hypothesis  
23  
24 that AVP mediates renal cyst growth. Serum samples will be frozen at  
25  
26  $-80^{\circ}\text{C}$ , and copeptin will be measured in batches using a sandwich  
27  
28 immunoluminometric assay (CT-proAVP Kryptor, Brahms, Germany).  
29  
30  
31  
32  
33  
34  
35  
36  
37  
38  
39  
40  
41  
42  
43  
44  
45  
46  
47  
48  
49  
50  
51  
52  
53  
54  
55  
56  
57  
58  
59  
60

**Table 2.** Schedule of Assessments

|                                                                              | Weeks  |   |                |                |   |    |    |    |    |    |    |    |     |     |     |     |     | Post-Treatment period |     |
|------------------------------------------------------------------------------|--------|---|----------------|----------------|---|----|----|----|----|----|----|----|-----|-----|-----|-----|-----|-----------------------|-----|
|                                                                              | Screen | 0 | 1              | 3              | 6 | 12 | 26 | 36 | 52 | 64 | 78 | 90 | 104 | 116 | 130 | 142 | 156 | 158                   | 160 |
| <b>Study Visits (SVs)</b>                                                    | 1      | 2 |                |                |   |    | 3  |    | 4  |    | 5  |    | 6   |     | 7   |     | 8   |                       | 9   |
| <b>Visits to External Pathology Collection Centre<sup>1</sup></b>            | 1      | 2 | 3 <sup>2</sup> | 4 <sup>2</sup> | 5 | 6  | 7  | 8  |    | 9  |    | 10 |     | 11  |     | 12  | 13  | 14                    |     |
| <b>Scheduled Telephone Call from Trial Staff (Group B)<sup>3</sup></b>       |        |   | X              | X              | X | X  | X  | X  | X  | X  | X  | X  | X   | X   | X   | X   | X   | X                     | X   |
| <b>Procedures and Evaluations</b>                                            |        |   |                |                |   |    |    |    |    |    |    |    |     |     |     |     |     |                       |     |
| Written informed consent                                                     | X      |   |                |                |   |    |    |    |    |    |    |    |     |     |     |     |     |                       |     |
| Inclusion and exclusion criteria                                             | X      | X |                |                |   |    |    |    |    |    |    |    |     |     |     |     |     |                       |     |
| Randomisation <sup>4</sup>                                                   |        | X |                |                |   |    |    |    |    |    |    |    |     |     |     |     |     |                       |     |
| Demographics(age, race, gender, education level and health insurance status) | X      |   |                |                |   |    |    |    |    |    |    |    |     |     |     |     |     |                       |     |

<sup>1</sup> The patients are to visit an External Pathology Collection Centre for blood and urine sample collection.

<sup>2</sup> Group B patients only for safety check and titration of water prescription

<sup>3</sup> Patients in Group B will receive scheduled telephone calls from the Study Nurse (with the Dietitian, as needed) to review changes in health, fluid intake, urine SG, laboratory results, Adverse event (AE), and provided coaching to alter water intake (if needed). These calls will be made at Week 1, 3, 6, and then monthly in Year 1 and 3-monthly in Years 2-3 (and as required). Patients in Group B will only be contacted if the pathology results meet the criteria for an AE.

<sup>4</sup> Patients randomised to Group B will receive specific advice on the amount of fluid required per day to reduce the urine osmolality to  $\leq 270$  mosmol/kg. Patients in Group B will be asked to self-monitor their urine specific gravity (SG) regularly at home using urine dipstick (provided to the patients), and adherence to the intervention will be quantified by patient responses to SMS text, sent twice weekly during months 0-6 and then monthly for the duration of the study, asking for the results of that day's urine SG.

|                                                                        | Weeks  |   |   |                |                |    |    |    |    |    |    |    |     |     |     |     |     | Post-Treatment period |     |
|------------------------------------------------------------------------|--------|---|---|----------------|----------------|----|----|----|----|----|----|----|-----|-----|-----|-----|-----|-----------------------|-----|
|                                                                        | Screen | 0 | 1 | 3              | 6              | 12 | 26 | 36 | 52 | 64 | 78 | 90 | 104 | 116 | 130 | 142 | 156 | 158                   | 160 |
| <b>Study Visits (SVs)</b>                                              | 1      | 2 |   |                |                |    | 3  |    | 4  |    | 5  |    | 6   |     | 7   |     | 8   |                       | 9   |
| <b>Visits to External Pathology Collection Centre<sup>1</sup></b>      | 1      | 2 |   | 3 <sup>2</sup> | 4 <sup>2</sup> | 5  | 6  | 7  | 8  |    | 9  |    | 10  |     | 11  |     | 12  | 13                    | 14  |
| <b>Scheduled Telephone Call from Trial Staff (Group B)<sup>3</sup></b> |        |   | X | X              | X              | X  | X  | X  | X  | X  | X  | X  | X   | X   | X   | X   | X   | X                     | X   |
| <b>Procedures and Evaluations</b>                                      |        |   |   |                |                |    |    |    |    |    |    |    |     |     |     |     |     |                       |     |
| Medical/ADPKD history                                                  | X      |   |   |                |                |    |    |    |    |    |    |    |     |     |     |     |     |                       |     |
| Concomitant medications                                                | X      | X | X | X              | X              | X  | X  | X  | X  | X  | X  | X  | X   | X   | X   | X   | X   | X                     | X   |
| Adverse events                                                         |        | X | X | X              | X              | X  | X  | X  | X  | X  | X  | X  | X   | X   | X   | X   | X   | X                     | X   |
| Kidney Pain Assessment                                                 | X      |   |   |                |                |    | X  |    | X  |    | X  |    | X   |     | X   |     | X   |                       | X   |
| Quality of Life Assessment                                             |        | X |   |                |                |    |    |    | X  |    |    |    | X   |     |     |     | X   |                       |     |
| Qualitative evaluation (Group B)                                       |        |   |   |                |                |    | X  |    | X  |    |    |    | X   |     |     |     | X   |                       |     |
| Patient acceptability question (Group B)                               |        |   |   |                |                |    | X  |    | X  |    |    |    | X   |     |     |     | X   |                       |     |
| Dietary and Fluid Intake <sup>5</sup>                                  | X      | X |   |                |                |    | X  |    | X  |    | X  |    | X   |     | X   |     | X   |                       | X   |
| Vital signs (heart rate,                                               | X      | X |   |                |                |    | X  |    | X  |    | X  |    | X   |     | X   |     | X   |                       | X   |

<sup>5</sup> All patients will conduct two 24-hour urine collections and record their fluid intake for those two days prior to Baseline Visit. The Study Dietitian will provide Group B patients with diet and fluid assessments and review during all study visits to ensure prescribed fluid intake is achieved and to validate a fluid intake tool.

|                                                                        | Weeks          |   |   |                |                |                |                |                |                |    |                |    |                |     |                |     |                | Post-Treatment period |                |
|------------------------------------------------------------------------|----------------|---|---|----------------|----------------|----------------|----------------|----------------|----------------|----|----------------|----|----------------|-----|----------------|-----|----------------|-----------------------|----------------|
|                                                                        | Screen         | 0 | 1 | 3              | 6              | 12             | 26             | 36             | 52             | 64 | 78             | 90 | 104            | 116 | 130            | 142 | 156            | 158                   | 160            |
| <b>Study Visits (SVs)</b>                                              | 1              | 2 |   |                |                |                | 3              |                | 4              |    | 5              |    | 6              |     | 7              |     | 8              |                       | 9              |
| <b>Visits to External Pathology Collection Centre<sup>1</sup></b>      | 1              | 2 |   | 3 <sup>2</sup> | 4 <sup>2</sup> | 5              | 6              | 7              | 8              |    | 9              |    | 10             |     | 11             |     | 12             | 13                    | 14             |
| <b>Scheduled Telephone Call from Trial Staff (Group B)<sup>3</sup></b> |                |   | X | X              | X              | X              | X              | X              | X              | X  | X              | X  | X              | X   | X              | X   | X              | X                     | X              |
| <b>Procedures and Evaluations</b>                                      |                |   |   |                |                |                |                |                |                |    |                |    |                |     |                |     |                |                       |                |
| abdominal girth), weight                                               |                |   |   |                |                |                |                |                |                |    |                |    |                |     |                |     |                |                       |                |
| Height                                                                 | X              |   |   |                |                |                |                |                |                |    |                |    |                |     |                |     |                |                       |                |
| Office BP                                                              | X              | X |   |                |                |                | X              |                | X              |    | X              |    | X              |     | X              |     | X              |                       | X              |
| Physical examination                                                   | X              |   |   |                |                |                |                |                |                |    |                |    |                |     |                |     |                |                       |                |
| Urinalysis (dipstick)                                                  | X              | X |   |                |                |                | X              |                | X              |    | X              |    | X              |     | X              |     | X              |                       | X              |
| TKV (by MRI)                                                           | X              |   |   |                |                |                |                |                |                |    | X              |    |                |     |                |     | X              |                       |                |
| 24-hour urine osmolality (External Pathology Centre)                   | X <sup>6</sup> |   |   |                |                | X <sup>7</sup> | X <sup>8</sup> | X <sup>7</sup> | X <sup>8</sup> |    | X <sup>8</sup> |    | X <sup>8</sup> |     | X <sup>8</sup> |     | X <sup>6</sup> |                       | X <sup>8</sup> |
| Routine blood tests (External Pathology Centre)                        | X              | X |   | X              | X              | X              | X              | X              | X              |    | X              |    | X              |     | X              |     | X              | X                     | X              |
| Serum copeptin                                                         | X              | X |   |                |                |                | X              |                | X              |    | X              |    | X              |     | X              |     | X              |                       | X              |

<sup>6</sup> To be collected following the Screening Visit and prior to the Final Visit (2 collections each)

<sup>7</sup> To be collected between study visits (one collection only)

<sup>8</sup> To be collected prior to the study visit (one collection only)



1  
2  
3  
4  
5  
6  
7  
8  
9  
10  
11  
12  
13  
14  
15  
16  
17  
18  
19  
20  
21  
22  
23  
24  
25  
26  
27  
28  
29  
30  
31  
32  
33  
34  
35  
36  
37  
38  
39  
40  
41  
42  
43  
44  
45  
46  
47  
48  
49

|                                                                        | Weeks  |   |   |                |                |    |    |    |    |    |    |    |     |     |     |     |     | Post-Treatment period |     |
|------------------------------------------------------------------------|--------|---|---|----------------|----------------|----|----|----|----|----|----|----|-----|-----|-----|-----|-----|-----------------------|-----|
|                                                                        | Screen | 0 | 1 | 3              | 6              | 12 | 26 | 36 | 52 | 64 | 78 | 90 | 104 | 116 | 130 | 142 | 156 | 158                   | 160 |
| <b>Study Visits (SVs)</b>                                              | 1      | 2 |   |                |                |    | 3  |    | 4  |    | 5  |    | 6   |     | 7   |     | 8   |                       | 9   |
| <b>Visits to External Pathology Collection Centre<sup>1</sup></b>      | 1      | 2 |   | 3 <sup>2</sup> | 4 <sup>2</sup> | 5  | 6  | 7  | 8  |    | 9  |    | 10  |     | 11  |     | 12  | 13                    | 14  |
| <b>Scheduled Telephone Call from Trial Staff (Group B)<sup>3</sup></b> |        |   | X | X              | X              | X  | X  | X  | X  | X  | X  | X  | X   | X   | X   | X   | X   | X                     | X   |
| <b>Procedures and Evaluations</b>                                      |        |   |   |                |                |    |    |    |    |    |    |    |     |     |     |     |     |                       |     |
| DNA for <i>PKD</i> gene analysis (blood sampling) <sup>9</sup>         | X      |   |   |                |                |    |    |    |    |    |    |    |     |     |     |     |     |                       |     |
| Urine and blood spot samples (biomarkers) <sup>10</sup>                | X      | X |   |                |                |    | X  |    | X  |    | X  |    | X   |     | X   |     | X   |                       | X   |

<sup>9</sup> To be collected at Screening for *PKD* gene analysis  
<sup>10</sup> To be collected at all Study Visits for exploratory renal biomarkers (stored at -80°C).

### Measures to reduce bias

The trial intervention is an unblinded behavioural modification. Bias and contamination could be introduced by a participant's expectations and prior knowledge of the hypothesised role of fluid intake in ADPKD. To minimise the effect of this problem:

- Both groups will be educated about the fact that fluid requirement in ADPKD is not known and that the intervention may be equally beneficial. The patient information consent form has been written in an objective, neutral manner to accurately reflect current evidence, and does not discuss the hypothesised benefits of fluid intake in ADPKD.
- Appointments will be scheduled for the two study groups at different times of the day to minimise the chance of Control Group participants meeting the Intervention Group in the waiting room.
- Outcome assessors will be blinded to participants' treatment allocations.

### Sample size calculation

In longitudinal data from the CRISP-II cohort, the average rate of increase in ht-TKV was 5.5% per year (SD, 3.8% per year;  $n = 201$ ; 8-year follow-up). Preclinical and clinical studies using pharmacological inhibition or adequate hydration to inhibit ADH-mediated cyst growth resulted in similar treatment efficacy of ~50% lesser increase in kidney volume.[10] In this trial, a more modest (but still clinically important) treatment effect of 35% is nominated. Using these assumptions, a total sample size of 150 will have 87% power to detect a difference in ht-TKV of 1.9% per year, using a 2-sided test and a 0.05 level of significance. Taking into

1  
2  
3 account the possibility of 15% dropouts, our aim is to include 180 participants ( $n = 90$   
4 per arm).  
5  
6

## 7 8 **Statistical Methods and Data Management**

9  
10 Intention-to-treat principles will be followed. Patient characteristics (age, sex,  
11 ht-TKV, eGFR) will be compared at baseline, and analysis of covariance will be used  
12 to analyse  $\log_{10}$  ht-TKV at Months 18 and 36, with baseline  $\log_{10}$  ht-TKV as the  
13 covariate. Assumptions of the analysis of covariance of normally distributed residuals  
14 and constant variance will be assessed with normal probability plots and residual vs  
15 fitted plots. Linear mixed-effects models will be used to test the interaction between  
16 treatment groups and time, if assumptions of equal covariance between times cannot  
17 be guaranteed. The adherence distribution will be constructed in the intervention arm  
18 by using the proportion of times a subject responds to the SMS. Outcome measure  
19 will be transformed to appropriate normality if required, and the chi-squared or Fisher  
20 exact test will be used to test the association between categorical variables. The Data  
21 Management Plan and the Electronic Case Report Forms (eCRFs) have been  
22 developed in the OpenClinica<sup>®</sup> platform, harmonised using NIH-CDISC terminology  
23 for ADPKD to enable future data sharing.[44] The Research Data Storage Plan has  
24 been approved by University of Sydney.  
25  
26  
27  
28  
29  
30  
31  
32  
33  
34  
35  
36  
37  
38  
39  
40  
41  
42  
43  
44  
45

## 46 **Process Evaluation of the Intervention**

47  
48 To understand patient experiences and attitudes about the Intervention  
49 (prescribed water intake), a Process Evaluation sub-study will be conducted, using  
50 methods previously described.[45] Measures assessed will include the frequency,  
51 timing and difficulties experienced with intervention and the intervention tools  
52 (telephone coaching, USG, SMS, water bottles, water and diet guidebook, website).  
53  
54  
55  
56  
57  
58  
59  
60

1  
2  
3 The data will be collected using a questionnaire during study visits, and a semi-  
4 structured telephone interview will be conducted in a minimum of 30 Intervention  
5 Group participants following the Final Study Visit. Thematic analysis will identify  
6 key facilitators and barriers to intervention uptake.  
7  
8  
9  
10

### 11 12 13 **Economic Evaluation**

14  
15 A trial-based economic evaluation, from the perspective of the health funder,  
16 will be conducted. Information on quality adjusted life years (QALYs) will be  
17 collected using the short form 6D (SF6D) calculated from the KDQOL. Self-reported  
18 health care utilisation and costs will be collected at routine clinic visits and  
19 intervention costs (staff, training, capital costs and consumables) will also be  
20 included. Using the mean costs and the mean health outcomes in each trial arm, the  
21 incremental costs per QALY of the Intervention Group compared with Control Group  
22 will be calculated; results will be plotted on a cost-effectiveness plane. Bootstrapping  
23 will be used to estimate a distribution around costs and health outcomes, and to  
24 calculate the confidence intervals around the incremental cost-effectiveness ratios.  
25 One-way and multi-way sensitivity analyses will be conducted around key variables.  
26 A cost-effectiveness acceptability curve will be plotted to provide information about  
27 the probability that the intervention is cost-effective, given willingness to pay for each  
28 additional QALY gained. We will also conduct a modelled economic evaluation vs  
29 tolvaptan, using trial costs and outcomes, supplemented with best available published  
30 evidence to consider costs and outcomes over a longer time horizon to account for  
31 future benefits in terms of delayed commencement of dialysis, quality of life and life  
32 expectancy. One-way and multi-way sensitivity analyses will be conducted around  
33 key variables and a probabilistic sensitivity analysis will estimate uncertainty in all  
34 parameters.  
35  
36  
37  
38  
39  
40  
41  
42  
43  
44  
45  
46  
47  
48  
49  
50  
51  
52  
53  
54  
55  
56  
57  
58  
59  
60

### **Data Monitoring Safety Board (DSMB)**

Prescribed fluid intake is considered a safe treatment. The risk of a serious AE related to hyponatraemia is expected to be very low in the study population (< 1:100,000), however, to mitigate this, serum sodium concentrations will be monitored regularly throughout the trial. An independent DSMB has been appointed to monitor the safety and conduct of this trial. Specific aspects that will be reviewed include recruitment rate and losses to follow-up, data quality, compliance with the protocol by participants and investigators, evidence for treatment harm (treatment group differences in SAEs), protocol modifications and continuing appropriates of participant information. The DSMB Charter was ratified in Oct 2016 and the first DSMB meeting occurred in December 2016.

### **Trial Monitoring**

The monitoring of the trial will be performed independently by the Australasian Kidney Trials Network using a combination of remote-monitoring tools and site visits.

### **Study Recruitment, Retention and Study Limitations**

As discussed earlier, to achieve the target recruitment and maintain retention, multiple recruitment strategies including presentations to local nephrologists, media advertisement and engagement of multiple sites for participants' convenience to attend study visits will be performed. The individualised nature of the study treatment and regular direct participant contact are key to the retention of participants.[46] There are no competing studies in ADPKD in the region of the study centres, and regulatory approval of tolvaptan for use in ADPKD has been attained in Europe,

Canada and Japan, but not in Australia and the United States of America, and therefore will not affect recruitment.[47] The study intervention (prescribed fluid intake) is reliant on the behavioural change to drinking habits of the participant. The tailored intervention with a variety of supporting tools as described under *Study intervention (Group B)* adopts a similar model to other successful long-term behaviour change interventions.[48,49]

### Proposed Timeline and Current Status of the Trial

The study has been in the planning phase from 2012-15, and trial recruitment commenced on 9<sup>th</sup> December 2015 (see Table 3). In 2016, the model of a mobile research team was implemented and the active study centres included Westmead, Nepean and Norwest Private Hospitals in Western Sydney and Gosford Renal Research on the NSW Central Coast. As of July 2017, 75% of the intended recruitment has been completed and 100% recruitment is anticipated by the end of 2017.

**Table 3.** Proposed timeline of the PREVENT-ADPKD Trial

| Year    | Milestone ( <i>italics denote milestone has been completed</i> )                                                                                                                                                                                                                                                                                                                                     |
|---------|------------------------------------------------------------------------------------------------------------------------------------------------------------------------------------------------------------------------------------------------------------------------------------------------------------------------------------------------------------------------------------------------------|
| 2012–15 | <i>Study protocol developed (Version 4); Australian and New Zealand Clinical Trial registration; lead-site ethics committee approval; trial endorsed by AKTN; data and biostatistical management plan developed; DSMB appointed; randomisation list and electronic case report forms (eCRFs) finalised; recruitment at Westmead Hospital started; Intervention Group supporting tools developed.</i> |

|         |                                                                                                                                                                 |
|---------|-----------------------------------------------------------------------------------------------------------------------------------------------------------------|
| 2016    | <i>Commenced recruitment at Norwest Private, Nepean Hospitals and Gosford Renal Research.<br/><br/>50% planned recruitment completed</i>                        |
| 2017    | <i>Commence recruitment at other Australian sites.<br/><br/>75% recruitment completed in July 2017<br/><br/>Plan to complete recruitment at the end of 2017</i> |
| 2018–19 | Follow-up of study participants.                                                                                                                                |
| 2020-21 | Last participant follow-up;<br><br>Study close-out, data analysis; report key findings.                                                                         |

### Outcomes and Significance

This trial will determine if fluid intake prescribed to maintain isotonic urine (implemented by coaching, SMS text reminders and self-monitoring of urine specific gravity by dipstick) reduces the progression of TKV in CKD Stages 1-3 due to ADPKD. While a negative result of a properly performed study will be significant in that it will settle the controversy regarding fluid intake in ADPKD, a positive study result will provide an inexpensive, widely generalisable and safe approach to slow renal cyst growth, and one that could be easily taken up in clinical practice and well-tolerated by consumers.[50] In the best-case scenario, if prescribed fluid intake is found to reduce the annualised rate of increase in TKV by 50%, the development of ESKD could be delayed by 6.5 years and life expectancy extended by 2.6 years,[51] at a negligible cost over standard treatment, but resulting in considerable cost savings for future treatments of ESKD. Even at lower efficacy this treatment option will be extremely good value for money and this is of vital importance in low-income countries where access to novel drugs and chronic dialysis are restricted due to lack of

1  
2  
3 affordability and availability. However, if the hypothesis is proven, the largest impact  
4  
5 will be in children and at-risk individuals with ADPKD (where its introduction in  
6  
7 early life could potentially prevent the onset of ESKD).  
8

### 9 10 **ETHICS AND DISSEMINATION**

11 The trial was approved by the Human Research Ethics Committee of the  
12  
13 Western Sydney Local Health District in 2014. The results will be submitted to  
14  
15 national and international conferences and peer-reviewed medical journals for  
16  
17 consideration of publication, after the last participant has completed the final study  
18  
19 visit and/or in the event of early termination of the trial for any reason.  
20  
21  
22  
23  
24

### 25 **ACKNOWLEDGEMENTS**

26  
27 The study protocol was reviewed by the Scientific Committee of the AKTN and the  
28  
29 NHMRC Grant Review Panels (2013, 2014, 2015, 2016) who provided feedback on  
30  
31 the study design. The authors thank Dr. William Clark and Dr. Louise Moist  
32  
33 (Division of Nephrology, London Health Sciences Centre, Canada) and Dr. Hakam  
34  
35 Gharbi (Danone Nutricia) for helpful discussions on the study protocol.  
36  
37  
38  
39  
40

### 41 **AUTHOR CONTRIBUTIONS**

42 All authors contributed and developed the study protocol. The rationale and  
43  
44 hypothesis for the trial arose from reviews and pilot studies in humans authored by  
45  
46 JGG and supported by the results of the TEMPO 251 clinical trial. GR developed the  
47  
48 initial version of the study protocol with JGG, DCH, VL and KS. AW, MAF and AR  
49  
50 contributed to the implementation of the intervention. KB provided initial  
51  
52 biostatistical advice and suggested using SMS texting as a potential measure of  
53  
54 compliance in the control group. JH and PM provided biostatistical advice and  
55  
56  
57  
58  
59  
60



1  
2  
3 developed the biostatistical plan. JC developed eCRF and data management protocols.  
4  
5 KH developed the protocol for health economic analysis. SF, TP, VT, BE, TJK and  
6  
7 ME developed protocols on analysis of TKV by MRI. DJ and CH provided input on  
8  
9 trial oversight and overall management. SC, SB, NB, IH, SJ, JM, CM, AP, SDR, EV  
10  
11 provided additional input into the study protocol.  
12  
13

## 14 15 16 **FUNDING STATEMENT**

17  
18 The development and commencement of the trial was funded by University of Sydney  
19  
20 Bridging Grants (2014, 2016), Westmead Medical Research Foundation, the Western  
21  
22 Sydney Local Health District and an investigator-initiated research grant from  
23  
24 Danone Research (France).  
25  
26  
27  
28

## 29 30 **COMPETING INTEREST STATEMENT**

31  
32 The study protocol was developed independently by the authors listed of this  
33  
34 manuscript. GR is the sole principal investigator listed on the grant received from  
35  
36 Danone Research to conduct this trial. The grant was awarded in December 2015 and  
37  
38 is being administered by the study sponsor (Western Sydney Local Health District).  
39  
40 GR has received travel support from Danone Research to attend an international  
41  
42 meeting on hydration (2016). No other authors have competing interests to declare.  
43  
44  
45  
46  
47

## 48 49 **REFERENCES**

- 50  
51 1. Rangan GK, Lopez-Vargas P, Nankivell BJ, et al. Autosomal Dominant Polycystic  
52 Kidney Disease: A Path Forward. *Semin Nephrol* 2015;35(6):524-37 doi:  
53 10.1016/j.semnephrol.2015.10.002 [published Online First: 22 December  
54 2015].  
55 2. Grantham JJ, Torres VE, Chapman AB, et al. Volume progression in polycystic  
56 kidney disease. *N Engl J Med* 2006;354(20):2122-30 doi:  
57 10.1056/NEJMoa054341 [published Online First: October 2005].  
58  
59  
60

3. Rangan GK, Shtangey V, McDonald S. Characteristics and survival of end-stage renal failure patients with PKD. *Nephrology (Carlton)* 2005;10(Suppl 3):A403.
4. Myint TM, Rangan GK, Webster AC. Treatments to slow progression of autosomal dominant polycystic kidney disease: systematic review and meta-analysis of randomized trials. *Nephrology (Carlton)* 2014;19(4):217-26 doi: 10.1111/nep.12211 [published Online First: 25 January 2014].
5. Christ-Crain M, Fenske W. Copeptin in the diagnosis of vasopressin-dependent disorders of fluid homeostasis. *Nat Rev Endocrinol* 2016;12(3):168-76 doi: 10.1038/nrendo.2015.224 [published Online First: 22 January 2016].
6. Bankir L, Bouby N, Ritz E. Vasopressin: a novel target for the prevention and retardation of kidney disease? *Nat Rev Nephrol* 2013;9(4):223-39 doi: 10.1038/nrneph.2013.22 [published Online First: 26 February 2013].
7. Torres VE, Bankir L, Grantham JJ. A case for water in the treatment of polycystic kidney disease. *Clin J Am Soc Nephrol* 2009;4(6):1140-50 doi: 10.2215/CJN.00790209 [published Online First: May 2009].
8. Wang X, Wu Y, Ward CJ, et al. Vasopressin directly regulates cyst growth in polycystic kidney disease. *J Am Soc Nephrol* 2008;19(1):102-08 doi: 10.1681/ASN.2007060688 [published Online First: 21 November 2007].
9. Gattone VH, 2nd, Wang X, Harris PC, et al. Inhibition of renal cystic disease development and progression by a vasopressin V2 receptor antagonist. *Nat Med* 2003;9(10):1323-26 doi: 10.1038/nm935 [published Online First: 21 September 2003].
10. Torres VE, Chapman AB, Devuyst O, et al. Tolvaptan in patients with autosomal dominant polycystic kidney disease. *N Engl J Med* 2012;367(25):2407-18 doi: 10.1056/NEJMoa1205511 [published Online First: 3 November 2012].
11. Wang CJ, Grantham JJ, Wetmore JB. The medicinal use of water in renal disease. *Kidney Int* 2013;84(1):45-53 doi: 10.1038/ki.2013.23 [published Online First: 20 February 2013].
12. Hopp K, Wang X, Ye H, et al. Effects of hydration in rats and mice with polycystic kidney disease. *Am J Physiol Renal Physiol* 2015;308(3):F261-66 doi: 10.1152/ajprenal.00345.2014 [published Online First: 10 December 2014].
13. Nagao S, Nishii K, Katsuyama M, et al. Increased water intake decreases progression of polycystic kidney disease in the PCK rat. *J Am Soc Nephrol* 2006;17(8):2220-27 doi: 10.1681/ASN.2006030251 [published Online First: 28 June 2006].
14. Wang X, Gattone V, 2nd, Harris PC, et al. Effectiveness of vasopressin V2 receptor antagonists OPC-31260 and OPC-41061 on polycystic kidney disease development in the PCK rat. *J Am Soc Nephrol* 2005;16(4):846-51 doi: 10.1681/ASN.2004121090 [published Online First: 23 February 2005].
15. Hebert LA, Greene T, Levey A, et al. High urine volume and low urine osmolality are risk factors for faster progression of renal disease. *Am J Kidney Dis* 2003;41(5):962-71.
16. Barash I, Ponda MP, Goldfarb DS, et al. A pilot clinical study to evaluate changes in urine osmolality and urine cAMP in response to acute and chronic water loading in autosomal dominant polycystic kidney disease. *Clin J Am Soc Nephrol* 2010;5(4):693-97 doi: 10.2215/CJN.04180609 [published Online First: February 2010].

17. Wang CJ, Creed C, Winklhofer FT, et al. Water prescription in autosomal dominant polycystic kidney disease: a pilot study. *Clin J Am Soc Nephrol* 2011;6(1):192-97 doi: 10.2215/CJN.03950510 [published Online First: September 2010].
18. Higashihara E, Nutahara K, Tanbo M, et al. Does increased water intake prevent disease progression in autosomal dominant polycystic kidney disease? *Nephrol Dial Transplant* 2014;29(9):1710-19 doi: 10.1093/ndt/gfu093 [published Online First: 15 April 2014].
19. Campbell KL, Rangan GK, Lopez-Vargas P, et al. KHA-CARI Autosomal Dominant Polycystic Kidney Disease Guideline: Diet and Lifestyle Management. *Semin Nephrol* 2015;35(6):572-81 e17 doi: 10.1016/j.semnephrol.2015.10.008 [published Online First: 22 December 2015].
20. Tong A, Tunnicliffe DJ, Lopez-Vargas P, et al. Identifying and integrating consumer perspectives in clinical practice guidelines on autosomal-dominant polycystic kidney disease. *Nephrology (Carlton)* 2016;21(2):122-32 doi: 10.1111/nep.12579 [published Online First: 31 July 2015].
21. Taylor JM, Hamilton-Reeves JM, Sullivan DK, et al. Diet and polycystic kidney disease: A pilot intervention study. *Clin Nutr* 2015 doi: 10.1016/j.clnu.2016.01.003 [published Online First: 11 January 2016].
22. Amro OW, Paulus JK, Noubary F, et al. Low-Osmolar Diet and Adjusted Water Intake for Vasopressin Reduction in Autosomal Dominant Polycystic Kidney Disease: A Pilot Randomized Controlled Trial. *Am J Kidney Dis* 2016;68(6):882-91 doi: 10.1053/j.ajkd.2016.07.023 [published Online First: 20 September 2016].
23. ClinicalTrials.gov. A Randomised Feasibility Trial of High Water Intake in Polycystic Kidney Disease (DRINK) [Internet] 12 October 2016 2016. <https://clinicaltrials.gov/ct2/show/nct02933268>.
24. Sontrop JM, Huang S-H, Garg AX, et al. Effect of increased water intake on plasma copeptin in patients with chronic kidney disease: results from a pilot randomised controlled trial. *BMJ open* 2015;5(11):e008634 doi: 10.1136/bmjopen-2015-008634 [published Online First: 24 November 2015].
25. Lee JS, Ahn S, Lee KH, et al. CONSORT 2010 Statement: Updated guidelines for reporting parallel group randomised trials. *Epidemiol Health* 2014 doi: 10.4178/epih/e2014029 [published Online First: 8 November 2014].
26. Rangan GK, Lee VW, Alexander SI, et al. KHA-CARI Autosomal Dominant Polycystic Kidney Disease Guideline: Screening for Polycystic Kidney Disease. *Semin Nephrol* 2015;35(6):557-64 e6 doi: 10.1016/j.semnephrol.2015.10.004 [published Online First: 22 December 2015].
27. Irazabal MV, Rangel LJ, Bergstralh EJ, et al. Imaging classification of autosomal dominant polycystic kidney disease: a simple model for selecting patients for clinical trials. *J Am Soc Nephrol* 2015;26(1):160-72 doi: 10.1681/ASN.2013101138 [published Online First: 5 June 2014].
28. Gul RB, Ali PA. Clinical trials: The challenge of recruitment and retention of participants. *J Clin Nurs* 2010;19(1-2):227-33 doi: 10.1111/j.1365-2702.2009.03041.x [published Online First: 17 December 2009].
29. Briel M, Olu KK, von Elm E, et al. A systematic review of discontinued trials suggested that most reasons for recruitment failure were preventable. *J Clin*

- Epidemiol* 2016;80:8-15 doi: 10.1016/j.jclinepi.2016.07.016 [published Online First: 3 August 2016].
30. Mahon E, Roberts J, Furlong P, et al. Barriers to Clinical Trial Recruitment and Possible Solutions: A Stakeholder Survey. 2015.
  31. Chapman AB, Torres VE, Perrone RD, et al. The HALT polycystic kidney disease trials: design and implementation. *Clin J Am Soc Nephrol* 2010;5(1):102-9 doi: 10.2215/cjn.04310709 [published Online First: 22 January 2010].
  32. Cox P. Insensible water loss and its assessment in adult patients: a review. *Acta Anaesthesiol Scand* 1987;31(8):771-76 doi: 10.1111/j.1399-6576.1987.tb02662.x [published Online First: 30 December 2008].
  33. Sawka MN, Chevront SN, Carter R. Human Water Needs. *Nutr Rev* 2005;63(Supplement 1):30-39 doi: 10.1301/nr.2005.jun.S30-S39 [published Online First: 28 June 2008].
  34. Chevront SN, Kenefick RW. Am I Drinking Enough? Yes, No, and Maybe. *J Am Coll Nutr* 2016;35(2):185-92 doi: 10.1080/07315724.2015.1067872 [published Online First: 17 February 2016].
  35. Frank M, De Vries A. Prevention of urolithiasis. Education to adequate fluid intake in a new town situated in the Judean Desert Mountains. *Arch Environ Health* 1966;13(5):625-30.
  36. Borghi L, Meschi T, Amato F, et al. Urinary volume, water and recurrences in idiopathic calcium nephrolithiasis: a 5-year randomized prospective study. *J Urol* 1996;155(3):839-43.
  37. O'Hara BJ, Phongsavan P, Venugopal K, et al. Effectiveness of Australia's Get Healthy Information and Coaching Service(R): translational research with population wide impact. *Prev Med* 2012;55(4):292-98 doi: 10.1016/j.ypmed.2012.07.022 [published Online First: 4 August 2012].
  38. Chua TX, Prasad NS, Rangan GK, et al. A systematic review to determine the most effective interventions to increase water intake. *Nephrology (Carlton)* 2016;21(10):860-69 doi: 10.1111/nep.12675 [published Online First: 12 September 2016].
  39. Chapman AB, Bost JE, Torres VE, et al. Kidney volume and functional outcomes in autosomal dominant polycystic kidney disease. *Clin J Am Soc Nephrol* 2012;7(3):479-86 doi: 10.2215/CJN.09500911 [published Online First: February 2012].
  40. Kline TL, Edwards ME, Korfiatis P, et al. Semiautomated Segmentation of Polycystic Kidneys in T2-Weighted MR Images. *AJR Am J Roentgenol* 2016;207(3):605-13 doi: 10.2214/AJR.15.15875 [published Online First: September 2016].
  41. Kline TL, Korfiatis P, Edwards ME, et al. Automatic total kidney volume measurement on follow-up magnetic resonance images to facilitate monitoring of autosomal dominant polycystic kidney disease progression. *Nephrol Dial Transplant* 2016;31(2):241-48 doi: 10.1093/ndt/gfv314 [published Online First: 31 August 2015].
  42. Boertien WE, Meijer E, Zitteema D, et al. Copeptin, a surrogate marker for vasopressin, is associated with kidney function decline in subjects with autosomal dominant polycystic kidney disease. *Nephrol Dial Transplant* 2012;27(11):4131-37 doi: 10.1093/ndt/gfs070 [published Online First: 20 April 2012].
  43. Bolignano D, Cabassi A, Fiaccadori E, et al. Copeptin (CTproAVP), a new tool for understanding the role of vasopressin in pathophysiology. *Clin Chem Lab*

- 1  
2  
3 *Med* 2014;52(10):1447-56 doi: 10.1515/cclm-2014-0379 [published Online  
4 First: 18 June 2014].
- 5 44. Kush R, Goldman M. Fostering responsible data sharing through standards. *N*  
6 *Engl J Med* 2014;370(23):2163-65 doi: 10.1056/NEJMp1401444 [published  
7 Online First: 5 June 2014].
- 8 45. Partridge SR, Allman-Farinelli M, McGeechan K, et al. Process evaluation of  
9 TXT2BFiT: a multi-component mHealth randomised controlled trial to  
10 prevent weight gain in young adults. *Int J Behav Nutr Phys Act* 2016;13(1):7  
11 doi: 10.1186/s12966-016-0329-2 [published Online First: 19 January 2016].
- 12 46. Good M, Schuler L. Subject retention in a controlled clinical trial. *J Adv Nurs*  
13 1997;26(2):351-55 doi: 10.1046/j.1365-2648.1997.1997026351.x [published  
14 Online First: 28 June 2008].
- 15 47. Gansevoort RT, Arici M, Benzing T, et al. Recommendations for the use of  
16 tolvaptan in autosomal dominant polycystic kidney disease: a position  
17 statement on behalf of the ERA-EDTA Working Groups on Inherited Kidney  
18 Disorders and European Renal Best Practice. *Nephrol Dial Transplant*  
19 2016;31(3):337-48 doi: 10.1093/ndt/gfv456 [published Online First: 29  
20 January 2016].
- 21 48. Knowler WC, Barrett-Connor E, Fowler SE, et al. Reduction in the Incidence of  
22 Type 2 Diabetes with Lifestyle Intervention or Metformin. *N Engl J Med*  
23 2002;346(6):393-403 doi: 10.1056/NEJMoa012512 [published Online First: 7  
24 February 2002].
- 25 49. Allman-Farinelli M, Partridge SR, McGeechan K, et al. A Mobile Health Lifestyle  
26 Program for Prevention of Weight Gain in Young Adults (TXT2BFiT): Nine-  
27 Month Outcomes of a Randomized Controlled Trial. *JMIR Mhealth Uhealth*  
28 2016;4(2):408-19 doi: 10.2196/mhealth.5768 [published Online First: 22 June  
29 2016].
- 30 50. McCauley LR, Dyer AJ, Stern K, et al. Factors influencing fluid intake behavior  
31 among kidney stone formers. *J Urol* 2012;187(4):1282-86 doi:  
32 10.1016/j.juro.2011.11.111 [published Online First: 15 February 2012].
- 33 51. Erickson KF, Chertow GM, Goldhaber-Fiebert JD. Cost-effectiveness of tolvaptan  
34 in autosomal dominant polycystic kidney disease. *Ann Intern Med*  
35 2013;159(6):382-89 doi: 10.7326/0003-4819-159-6-201309170-00004  
36 [published Online First: 17 September 2013].  
37  
38  
39  
40  
41  
42

43 **Figure 1:** Schema of the PREVENT-ADPKD Trial Design. (adapted from Ref. 9)  
44  
45  
46  
47  
48  
49  
50  
51  
52  
53  
54  
55  
56  
57  
58  
59  
60



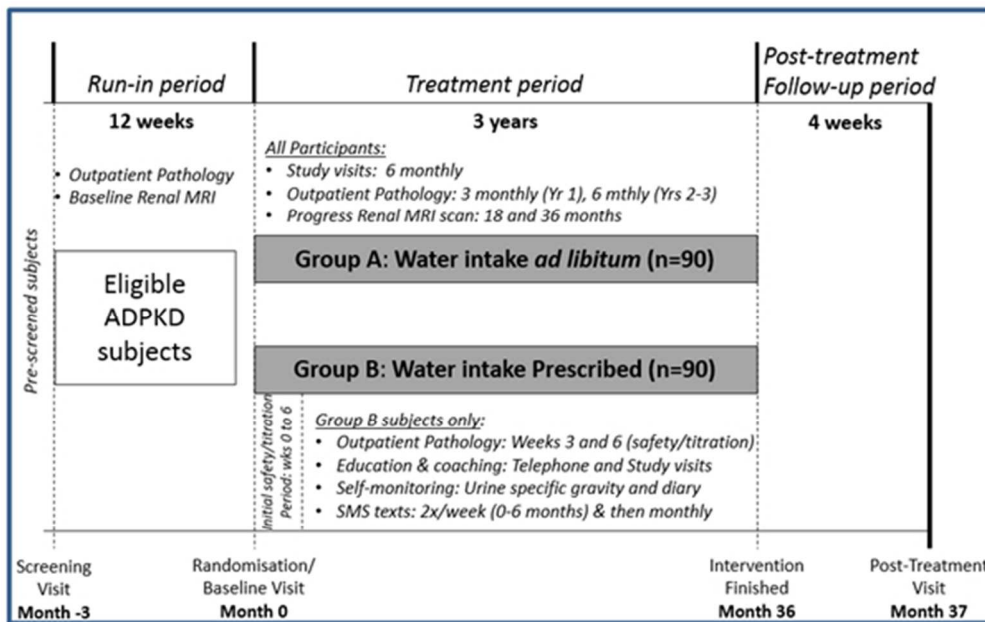

Figure 1: Schema of the PREVENT-ADPKD Trial Design. (adapted from Ref. 9)

160x100mm (96 x 96 DPI)

Review only

**Table 2.** Schedule of Assessments

|                                                                              | Weeks  |   |   |                |                |    |    |    |    |    |    |    |     |     |     |     |     | Post-Treatment period |     |
|------------------------------------------------------------------------------|--------|---|---|----------------|----------------|----|----|----|----|----|----|----|-----|-----|-----|-----|-----|-----------------------|-----|
|                                                                              | Screen | 0 | 1 | 3              | 6              | 12 | 26 | 36 | 52 | 64 | 78 | 90 | 104 | 116 | 130 | 142 | 156 | 158                   | 160 |
| <b>Study Visits (SVs)</b>                                                    | 1      | 2 |   |                |                |    | 3  |    | 4  |    | 5  |    | 6   |     | 7   |     | 8   |                       | 9   |
| <b>Visits to External Pathology Collection Centre<sup>1</sup></b>            | 1      | 2 |   | 3 <sup>2</sup> | 4 <sup>2</sup> | 5  | 6  | 7  | 8  |    | 9  |    | 10  |     | 11  |     | 12  | 13                    | 14  |
| <b>Scheduled Telephone Call from Trial Staff (Group B)<sup>3</sup></b>       |        |   | X | X              | X              | X  | X  | X  | X  | X  | X  | X  | X   | X   | X   | X   | X   | X                     | X   |
| <b>Procedures and Evaluations</b>                                            |        |   |   |                |                |    |    |    |    |    |    |    |     |     |     |     |     |                       |     |
| Written informed consent                                                     | X      |   |   |                |                |    |    |    |    |    |    |    |     |     |     |     |     |                       |     |
| Inclusion and exclusion criteria                                             | X      | X |   |                |                |    |    |    |    |    |    |    |     |     |     |     |     |                       |     |
| Randomisation <sup>4</sup>                                                   |        | X |   |                |                |    |    |    |    |    |    |    |     |     |     |     |     |                       |     |
| Demographics(age, race, gender, education level and health insurance status) | X      |   |   |                |                |    |    |    |    |    |    |    |     |     |     |     |     |                       |     |
| Medical/ADPKD history                                                        | X      |   |   |                |                |    |    |    |    |    |    |    |     |     |     |     |     |                       |     |

<sup>1</sup> The patients are to visit an External Pathology Collection Centre for blood and urine sample collection.

<sup>2</sup> Group B patients only for safety check and titration of water prescription

<sup>3</sup> Patients in Group B will receive scheduled telephone calls from the Study Nurse (with the Dietitian, as needed) to review changes in health, fluid intake, urine SG, laboratory results, Adverse event (AE), and provided coaching to alter water intake (if needed). These calls will be made at Week 1, 3, 6, and then monthly in Year 1 and 3-monthly in Years 2-3 (and as required). Patients in Group B will only be contacted if the pathology results meet the criteria for an AE.

<sup>4</sup> Patients randomised to Group B will receive specific advice on the amount of fluid required per day to reduce the urine osmolality to  $\leq 270$  mosmol/kg. Patients in Group B will be asked to self-monitor their urine specific gravity (SG) regularly at home using urine dipstick (provided to the patients), and adherence to the intervention will be quantified by patient responses to SMS text, sent twice weekly during months 0-6 and then monthly for the duration of the study, asking for the results of that day's urine SG.

|                                                                        | Weeks  |   |   |                |                |    |    |    |    |    |    |    |     |     |     |     |     | Post-Treatment period |     |
|------------------------------------------------------------------------|--------|---|---|----------------|----------------|----|----|----|----|----|----|----|-----|-----|-----|-----|-----|-----------------------|-----|
|                                                                        | Screen | 0 | 1 | 3              | 6              | 12 | 26 | 36 | 52 | 64 | 78 | 90 | 104 | 116 | 130 | 142 | 156 | 158                   | 160 |
| <b>Study Visits (SVs)</b>                                              | 1      | 2 |   |                |                |    | 3  |    | 4  |    | 5  |    | 6   |     | 7   |     | 8   |                       | 9   |
| <b>Visits to External Pathology Collection Centre<sup>1</sup></b>      | 1      | 2 |   | 3 <sup>2</sup> | 4 <sup>2</sup> | 5  | 6  | 7  | 8  |    | 9  |    | 10  |     | 11  |     | 12  | 13                    | 14  |
| <b>Scheduled Telephone Call from Trial Staff (Group B)<sup>3</sup></b> |        |   | X | X              | X              | X  | X  | X  | X  | X  | X  | X  | X   | X   | X   | X   | X   | X                     | X   |
| <b>Procedures and Evaluations</b>                                      |        |   |   |                |                |    |    |    |    |    |    |    |     |     |     |     |     |                       |     |
| Concomitant medications                                                | X      | X | X | X              | X              | X  | X  | X  | X  | X  | X  | X  | X   | X   | X   | X   | X   | X                     | X   |
| Adverse events                                                         |        | X | X | X              | X              | X  | X  | X  | X  | X  | X  | X  | X   | X   | X   | X   | X   | X                     | X   |
| Kidney Pain Assessment                                                 | X      |   |   |                |                |    | X  |    | X  |    | X  |    | X   |     | X   |     | X   |                       | X   |
| Quality of Life Assessment                                             |        | X |   |                |                |    |    |    | X  |    |    |    | X   |     |     |     | X   |                       |     |
| Qualitative evaluation (Group B)                                       |        |   |   |                |                |    | X  |    | X  |    |    |    | X   |     |     |     | X   |                       |     |
| Patient acceptability question (Group B)                               |        |   |   |                |                |    | X  |    | X  |    |    |    | X   |     |     |     | X   |                       |     |
| Dietary and Fluid Intake <sup>5</sup>                                  | X      | X |   |                |                |    | X  |    | X  |    | X  |    | X   |     | X   |     | X   |                       | X   |
| Vital signs (heart rate, abdominal girth), weight                      | X      | X |   |                |                |    | X  |    | X  |    | X  |    | X   |     | X   |     | X   |                       | X   |
| Height                                                                 | X      |   |   |                |                |    |    |    |    |    |    |    |     |     |     |     |     |                       |     |

<sup>5</sup> All patients will conduct two 24-hour urine collections and record their fluid intake for those two days prior to Baseline Visit. The Study Dietitian will provide Group B patients with diet and fluid assessments and review during all study visits to ensure prescribed fluid intake is achieved and to validate a fluid intake tool.



|                                                                        | Weeks          |   |   |                |                |    |                |                |                |                |    |                |     |                |     |                |     | Post-Treatment period |     |                |
|------------------------------------------------------------------------|----------------|---|---|----------------|----------------|----|----------------|----------------|----------------|----------------|----|----------------|-----|----------------|-----|----------------|-----|-----------------------|-----|----------------|
|                                                                        | Screen         | 0 | 1 | 3              | 6              | 12 | 26             | 36             | 52             | 64             | 78 | 90             | 104 | 116            | 130 | 142            | 156 | 158                   | 160 |                |
| <b>Study Visits (SVs)</b>                                              | 1              | 2 |   |                |                |    | 3              |                | 4              |                | 5  |                | 6   |                | 7   |                | 8   |                       | 9   |                |
| <b>Visits to External Pathology Collection Centre<sup>1</sup></b>      | 1              | 2 |   | 3 <sup>2</sup> | 4 <sup>2</sup> | 5  | 6              | 7              | 8              |                | 9  |                | 10  |                | 11  |                | 12  | 13                    | 14  |                |
| <b>Scheduled Telephone Call from Trial Staff (Group B)<sup>3</sup></b> |                |   | X | X              | X              | X  | X              | X              | X              | X              | X  | X              | X   | X              | X   | X              | X   | X                     | X   |                |
| <b>Procedures and Evaluations</b>                                      |                |   |   |                |                |    |                |                |                |                |    |                |     |                |     |                |     |                       |     |                |
| Office BP                                                              | X              | X |   |                |                |    | X              |                | X              |                | X  |                | X   |                | X   |                | X   |                       | X   |                |
| Physical examination                                                   | X              |   |   |                |                |    |                |                |                |                |    |                |     |                |     |                |     |                       |     |                |
| Urinalysis (dipstick)                                                  | X              | X |   |                |                |    | X              |                | X              |                | X  |                | X   |                | X   |                | X   |                       | X   |                |
| TKV (by MRI)                                                           | X              |   |   |                |                |    |                |                |                |                | X  |                |     |                |     |                | X   |                       |     |                |
| 24-hour urine osmolality (External Pathology Centre)                   | X <sup>6</sup> |   |   |                |                |    | X <sup>7</sup> | X <sup>8</sup> | X <sup>7</sup> | X <sup>8</sup> |    | X <sup>8</sup> |     | X <sup>8</sup> |     | X <sup>8</sup> |     | X <sup>6</sup>        |     | X <sup>8</sup> |
| Routine blood tests (External Pathology Centre)                        | X              | X |   | X              | X              | X  | X              | X              | X              |                | X  |                | X   |                | X   |                | X   | X                     | X   |                |
| Serum copeptin                                                         | X              | X |   |                |                |    | X              |                | X              |                | X  |                | X   |                | X   |                | X   |                       | X   |                |

<sup>6</sup> To be collected following the Screening Visit and prior to the Final Visit (2 collections each)

<sup>7</sup> To be collected between study visits (one collection only)

<sup>8</sup> To be collected prior to the study visit (one collection only)

|                                                                        | Weeks  |   |   |                |                |    |    |    |    |    |    |    |     |     |     |     |     | Post-Treatment period |     |
|------------------------------------------------------------------------|--------|---|---|----------------|----------------|----|----|----|----|----|----|----|-----|-----|-----|-----|-----|-----------------------|-----|
|                                                                        | Screen | 0 | 1 | 3              | 6              | 12 | 26 | 36 | 52 | 64 | 78 | 90 | 104 | 116 | 130 | 142 | 156 | 158                   | 160 |
| <b>Study Visits (SVs)</b>                                              | 1      | 2 |   |                |                |    | 3  |    | 4  |    | 5  |    | 6   |     | 7   |     | 8   |                       | 9   |
| <b>Visits to External Pathology Collection Centre<sup>1</sup></b>      | 1      | 2 |   | 3 <sup>2</sup> | 4 <sup>2</sup> | 5  | 6  | 7  | 8  |    | 9  |    | 10  |     | 11  |     | 12  | 13                    | 14  |
| <b>Scheduled Telephone Call from Trial Staff (Group B)<sup>3</sup></b> |        |   | X | X              | X              | X  | X  | X  | X  | X  | X  | X  | X   | X   | X   | X   | X   | X                     | X   |
| <b>Procedures and Evaluations</b>                                      |        |   |   |                |                |    |    |    |    |    |    |    |     |     |     |     |     |                       |     |
| DNA for <i>PKD</i> gene analysis (blood sampling) <sup>9</sup>         | X      |   |   |                |                |    |    |    |    |    |    |    |     |     |     |     |     |                       |     |
| Urine and blood spot samples (biomarkers) <sup>10</sup>                | X      | X |   |                |                |    | X  | X  |    | X  |    | X  |     | X   |     | X   |     | X                     |     |

<sup>9</sup> To be collected at Screening for *PKD* gene analysis

<sup>10</sup> To be collected at all Study Visits for exploratory renal biomarkers (stored at -80°C).

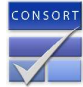

## CONSORT 2010 checklist of information to include when reporting a randomised trial\*

| Section/Topic                    | Item No | Checklist item                                                                                                                                                                              | Reported on page No |
|----------------------------------|---------|---------------------------------------------------------------------------------------------------------------------------------------------------------------------------------------------|---------------------|
| <b>Title and abstract</b>        |         |                                                                                                                                                                                             |                     |
|                                  | 1a      | Identification as a randomised trial in the title                                                                                                                                           | 1                   |
|                                  | 1b      | Structured summary of trial design, methods, results, and conclusions (for specific guidance see CONSORT for abstracts)                                                                     | 3                   |
| <b>Introduction</b>              |         |                                                                                                                                                                                             |                     |
| Background and objectives        | 2a      | Scientific background and explanation of rationale                                                                                                                                          | 5                   |
|                                  | 2b      | Specific objectives or hypotheses                                                                                                                                                           | 7                   |
| <b>Methods</b>                   |         |                                                                                                                                                                                             |                     |
| Trial design                     | 3a      | Description of trial design (such as parallel, factorial) including allocation ratio                                                                                                        | 7                   |
|                                  | 3b      | Important changes to methods after trial commencement (such as eligibility criteria), with reasons                                                                                          | N/A                 |
| Participants                     | 4a      | Eligibility criteria for participants                                                                                                                                                       | 8                   |
|                                  | 4b      | Settings and locations where the data were collected                                                                                                                                        | 9                   |
| Interventions                    | 5       | The interventions for each group with sufficient details to allow replication, including how and when they were actually administered                                                       | 12                  |
| Outcomes                         | 6a      | Completely defined pre-specified primary and secondary outcome measures, including how and when they were assessed                                                                          | 16                  |
|                                  | 6b      | Any changes to trial outcomes after the trial commenced, with reasons                                                                                                                       | N/A                 |
| Sample size                      | 7a      | How sample size was determined                                                                                                                                                              | 24                  |
|                                  | 7b      | When applicable, explanation of any interim analyses and stopping guidelines                                                                                                                | N/A                 |
| Randomisation:                   |         |                                                                                                                                                                                             |                     |
| Sequence generation              | 8a      | Method used to generate the random allocation sequence                                                                                                                                      | 12                  |
|                                  | 8b      | Type of randomisation; details of any restriction (such as blocking and block size)                                                                                                         | 12                  |
| Allocation concealment mechanism | 9       | Mechanism used to implement the random allocation sequence (such as sequentially numbered containers), describing any steps taken to conceal the sequence until interventions were assigned | 12                  |
| Implementation                   | 10      | Who generated the random allocation sequence, who enrolled participants, and who assigned participants to interventions                                                                     | 12                  |
| Blinding                         | 11a     | If done, who was blinded after assignment to interventions (for example, participants, care providers, those                                                                                | N/A                 |

|                                                      |     |                                                                                                                                                   |     |
|------------------------------------------------------|-----|---------------------------------------------------------------------------------------------------------------------------------------------------|-----|
|                                                      |     | assessing outcomes) and how                                                                                                                       |     |
|                                                      | 11b | If relevant, description of the similarity of interventions                                                                                       | 15  |
| Statistical methods                                  | 12a | Statistical methods used to compare groups for primary and secondary outcomes                                                                     | 25  |
|                                                      | 12b | Methods for additional analyses, such as subgroup analyses and adjusted analyses                                                                  | N/A |
| <b>Results</b>                                       |     |                                                                                                                                                   |     |
| Participant flow (a diagram is strongly recommended) | 13a | For each group, the numbers of participants who were randomly assigned, received intended treatment, and were analysed for the primary outcome    | N/A |
|                                                      | 13b | For each group, losses and exclusions after randomisation, together with reasons                                                                  | N/A |
| Recruitment                                          | 14a | Dates defining the periods of recruitment and follow-up                                                                                           | 29  |
|                                                      | 14b | Why the trial ended or was stopped                                                                                                                | N/A |
| Baseline data                                        | 15  | A table showing baseline demographic and clinical characteristics for each group                                                                  | N/A |
| Numbers analysed                                     | 16  | For each group, number of participants (denominator) included in each analysis and whether the analysis was by original assigned groups           | N/A |
| Outcomes and estimation                              | 17a | For each primary and secondary outcome, results for each group, and the estimated effect size and its precision (such as 95% confidence interval) | N/A |
|                                                      | 17b | For binary outcomes, presentation of both absolute and relative effect sizes is recommended                                                       | N/A |
| Ancillary analyses                                   | 18  | Results of any other analyses performed, including subgroup analyses and adjusted analyses, distinguishing pre-specified from exploratory         | N/A |
| Harms                                                | 19  | All important harms or unintended effects in each group (for specific guidance see CONSORT for harms)                                             | N/A |
| <b>Discussion</b>                                    |     |                                                                                                                                                   |     |
| Limitations                                          | 20  | Trial limitations, addressing sources of potential bias, imprecision, and, if relevant, multiplicity of analyses                                  | 24  |
| Generalisability                                     | 21  | Generalisability (external validity, applicability) of the trial findings                                                                         | 29  |
| Interpretation                                       | 22  | Interpretation consistent with results, balancing benefits and harms, and considering other relevant evidence                                     | N/A |
| <b>Other information</b>                             |     |                                                                                                                                                   |     |
| Registration                                         | 23  | Registration number and name of trial registry                                                                                                    | 7   |
| Protocol                                             | 24  | Where the full trial protocol can be accessed, if available                                                                                       | N/A |
| Funding                                              | 25  | Sources of funding and other support (such as supply of drugs), role of funders                                                                   | 31  |

\*We strongly recommend reading this statement in conjunction with the CONSORT 2010 Explanation and Elaboration for important clarifications on all the items. If relevant, we also recommend reading CONSORT extensions for cluster randomised trials, non-inferiority and equivalence trials, non-pharmacological treatments, herbal interventions, and pragmatic trials. Additional extensions are forthcoming: for those and for up to date references relevant to this checklist, see [www.consort-statement.org](http://www.consort-statement.org).

# BMJ Open

**The study protocol of a randomised controlled trial to determine efficacy and safety of prescribed water intake to prevent kidney failure due to autosomal dominant polycystic kidney disease (PREVENT-ADPKD)**

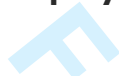

|                               |                                                                                                                                                                                                                                                                                                                                                                                                                                                                                                                                                                                                                                                                                                                                                                                                                                                                                                                                                                                                                                                                                                                                                                                                                                                                                                                                                                                                                                                                                                                                                                                                                                                                                                                                                                                                                                                                                                                                                                                                                                                                                                                                                                                                                                             |
|-------------------------------|---------------------------------------------------------------------------------------------------------------------------------------------------------------------------------------------------------------------------------------------------------------------------------------------------------------------------------------------------------------------------------------------------------------------------------------------------------------------------------------------------------------------------------------------------------------------------------------------------------------------------------------------------------------------------------------------------------------------------------------------------------------------------------------------------------------------------------------------------------------------------------------------------------------------------------------------------------------------------------------------------------------------------------------------------------------------------------------------------------------------------------------------------------------------------------------------------------------------------------------------------------------------------------------------------------------------------------------------------------------------------------------------------------------------------------------------------------------------------------------------------------------------------------------------------------------------------------------------------------------------------------------------------------------------------------------------------------------------------------------------------------------------------------------------------------------------------------------------------------------------------------------------------------------------------------------------------------------------------------------------------------------------------------------------------------------------------------------------------------------------------------------------------------------------------------------------------------------------------------------------|
| Journal:                      | <i>BMJ Open</i>                                                                                                                                                                                                                                                                                                                                                                                                                                                                                                                                                                                                                                                                                                                                                                                                                                                                                                                                                                                                                                                                                                                                                                                                                                                                                                                                                                                                                                                                                                                                                                                                                                                                                                                                                                                                                                                                                                                                                                                                                                                                                                                                                                                                                             |
| Manuscript ID                 | bmjopen-2017-018794.R1                                                                                                                                                                                                                                                                                                                                                                                                                                                                                                                                                                                                                                                                                                                                                                                                                                                                                                                                                                                                                                                                                                                                                                                                                                                                                                                                                                                                                                                                                                                                                                                                                                                                                                                                                                                                                                                                                                                                                                                                                                                                                                                                                                                                                      |
| Article Type:                 | Protocol                                                                                                                                                                                                                                                                                                                                                                                                                                                                                                                                                                                                                                                                                                                                                                                                                                                                                                                                                                                                                                                                                                                                                                                                                                                                                                                                                                                                                                                                                                                                                                                                                                                                                                                                                                                                                                                                                                                                                                                                                                                                                                                                                                                                                                    |
| Date Submitted by the Author: | 06-Oct-2017                                                                                                                                                                                                                                                                                                                                                                                                                                                                                                                                                                                                                                                                                                                                                                                                                                                                                                                                                                                                                                                                                                                                                                                                                                                                                                                                                                                                                                                                                                                                                                                                                                                                                                                                                                                                                                                                                                                                                                                                                                                                                                                                                                                                                                 |
| Complete List of Authors:     | <p>Wong, Annette; The Westmead Institute for Medical Research, Centre for Transplant and Renal Research<br/> Mannix, Carly; The Westmead Institute for Medical Research, Centre for Transplant and Renal Research<br/> Grantham, Jared; University of Kansas Medical Center<br/> Allman-Farinelli, Margaret; University of Sydney, School of Life and Environmental Sciences<br/> Badve, Sunil; St. George Hospital, Department of Nephrology<br/> Boudville, Neil; Sir Charles Gairdner Hospital<br/> Byth, Karen; NHMRC Clinical Trials Centre, University of Sydney and WSLHD Research and Education Network<br/> Chan, Jessie; McCloud Consulting Group, Biostatistics and Data Management<br/> Coulshed, Susan; North Shore Nephrology<br/> Edwards, Marie; Mayo Clinic, Translational Polycystic Kidney Disease Center<br/> Erickson, Bradley; Mayo Clinic, Translational Polycystic Kidney Disease Center<br/> Fernando, Mangalee; Prince of Wales Hospital and Community Health Services, Department of Renal Medicine<br/> Foster, Sheryl; Westmead Hospital, Department of Radiology; The University of Sydney, Faculty of Health Sciences<br/> Haloob, Imad; Bathurst Base Hospital, Department of Renal Medicine<br/> Harris, David; The Westmead Institute for Medical Research, Centre for Transplant and Renal Research; Westmead Hospital, Department of Renal Medicine<br/> Hawley, Carmel; University of Queensland at Princess Alexandra Hospital, Australasian Kidney Trials Network<br/> Hill, Julie; McCloud Consulting Group, Biostatistics and Data Management<br/> Howard, Kirsten; University of Sydney, School of Public Health<br/> Howell, Martin; University of Sydney - Camperdown and Darlington Campus, School of Public Health<br/> Jiang, Simon; Canberra Hospital, Department of Renal Medicine; Australian National University, Department of Immunology and Infectious Diseases<br/> Johnson, David; University of Queensland at Princess Alexandra Hospital, Australasian Kidney Trials Network<br/> Kline, Timothy; Mayo Clinic, Translational Polycystic Kidney Disease Center<br/> Kumar, Karthik; Gosford Nephrology<br/> Lee, Vincent; Westmead Hospital, Department of Renal Medicine; The</p> |

|                                 |                                                                                                                                                                                                                                                                                                                                                                                                                                                                                                                                                                                                                                                                                                                                                                                                                                                                                                                                                                                                                                     |
|---------------------------------|-------------------------------------------------------------------------------------------------------------------------------------------------------------------------------------------------------------------------------------------------------------------------------------------------------------------------------------------------------------------------------------------------------------------------------------------------------------------------------------------------------------------------------------------------------------------------------------------------------------------------------------------------------------------------------------------------------------------------------------------------------------------------------------------------------------------------------------------------------------------------------------------------------------------------------------------------------------------------------------------------------------------------------------|
|                                 | Westmead Institute for Medical Research, Centre for Transplant and Renal Research<br>Lonergan, Maureen; Wollongong Hospital, Renal Medicine; University of Wollongong Illawarra Health and Medical Research Institute<br>Mai, Jun; Liverpool Hospital, Department of Renal Medicine<br>McCloud, Philip; McCloud Consulting Group, Biostatistics and Data Management<br>Peduto, Anthony; University of Sydney, Faculty of Health Sciences<br>Rangan, Anna; University of Sydney, School of Life and Environmental Sciences<br>Roger, Simon; Gosford Renal Research<br>Sud, Kamal; The Westmead Institute for Medical Research, Centre for Transplant and Renal Research; Nepean Hospital, Department of Renal Medicine<br>Torres, Vincent; Mayo Clinic, Translational Polycystic Kidney Disease Centre<br>Vliayuri, Eswari; John Hunter Hospital, Department of Nephrology<br>Rangan, Gopala; The Westmead Institute for Medical Research, Centre for Transplant and Renal Research; Westmead Hospital, Department of Renal Medicine |
| <b>Primary Subject Heading</b>: | Renal medicine                                                                                                                                                                                                                                                                                                                                                                                                                                                                                                                                                                                                                                                                                                                                                                                                                                                                                                                                                                                                                      |
| Secondary Subject Heading:      | Nutrition and metabolism                                                                                                                                                                                                                                                                                                                                                                                                                                                                                                                                                                                                                                                                                                                                                                                                                                                                                                                                                                                                            |
| Keywords:                       | Chronic renal failure < NEPHROLOGY, Adult nephrology < NEPHROLOGY, Magnetic resonance imaging < RADIOLOGY & IMAGING                                                                                                                                                                                                                                                                                                                                                                                                                                                                                                                                                                                                                                                                                                                                                                                                                                                                                                                 |
|                                 |                                                                                                                                                                                                                                                                                                                                                                                                                                                                                                                                                                                                                                                                                                                                                                                                                                                                                                                                                                                                                                     |

SCHOLARONE™  
Manuscripts

Review only

1  
2  
3 The study protocol of a randomised controlled trial to determine efficacy and safety of  
4 prescribed water intake to prevent kidney failure due to autosomal dominant  
5 polycystic kidney disease (PREVENT-ADPKD)  
6  
7  
8  
9

10  
11 Authors: Annette T.Y. Wong<sup>1,2</sup>, Carly Mannix<sup>1,2</sup>, Jared J. Grantham<sup>3</sup>, Margaret  
12 Allman-Farinelli<sup>4</sup>, Sunil V. Badve<sup>5</sup>, Neil Boudville<sup>6</sup>, Karen Byth<sup>7</sup>, Jessica Chan<sup>8</sup>,  
13 Susan Coulshed<sup>9</sup>, Marie E. Edwards<sup>10</sup>, Bradley Erickson<sup>10</sup>, Mangalee Fernando<sup>11</sup>,  
14 Sheryl Foster<sup>12,13</sup>, Imad Haloob<sup>14</sup>, David C.H. Harris<sup>1,2</sup>, Carmel M. Hawley<sup>15</sup>, Julie  
15 Hill<sup>8</sup>, Kirsten Howard<sup>16</sup>, Martin Howell<sup>16</sup>, Simon H. Jiang<sup>17,18</sup>, David W. Johnson<sup>15</sup>,  
16 Timothy L. Kline<sup>10</sup>, Karthik Kumar<sup>19</sup>, Vincent W. Lee<sup>1,2,20</sup>, Maureen Lonergan<sup>21</sup>, Jun  
17 Mai<sup>22</sup>, Philip McCloud<sup>8</sup>, Anthony Peduto<sup>12</sup>, Anna Rangan<sup>4</sup>, Simon D. Roger<sup>23</sup>, Kamal  
18 Sud<sup>1,24,25</sup>, Vicente Torres<sup>10</sup>, Eswari Vliayuri<sup>26</sup>, Gopala K. Rangan<sup>1,2</sup>  
19  
20  
21  
22  
23  
24  
25  
26  
27  
28  
29  
30  
31

32 <sup>1</sup>Centre for Transplant and Renal Research, Westmead Institute for Medical Research,  
33 The University of Sydney, Westmead, NSW, Australia;

34 <sup>2</sup>Department of Renal Medicine, Westmead Hospital, Western Sydney Local Health  
35 District, Westmead, NSW, Australia;

36 <sup>3</sup>Kansas University Medical Center, Kansas City, Kansas, USA;

37 <sup>4</sup>School of Life and Environmental Sciences, The Charles Perkins Centre, The  
38 University of Sydney, Sydney, NSW, Australia;

39 <sup>5</sup>Department of Renal Medicine, St George Hospital, Kogarah, NSW, Australia

40 <sup>6</sup>Department of Renal Medicine, Sir Charles Gairdner Hospital, Nedlands and the  
41 Harry Perkins Institute of Medical Research, University of Western Australia, WA,  
42 Australia  
43  
44  
45  
46  
47  
48  
49  
50  
51  
52  
53  
54  
55  
56  
57  
58  
59  
60

1  
2  
3 <sup>7</sup>Research and Education Network, Westmead Hospital, Western Sydney Local  
4  
5 Health District, Westmead, NSW, Australia;

6  
7 <sup>8</sup>McCloud Consulting Group, Gordon, NSW, Australia;

8  
9 <sup>9</sup>North Shore Nephrology, Crows Nest, NSW, Australia;

10  
11 <sup>10</sup>Translational Polycystic Kidney Disease Center, Mayo Clinic, Rochester,  
12  
13 Minnesota, USA;

14  
15 <sup>11</sup>Department of Renal Medicine, Prince of Wales Hospital, Eastern Sydney Health  
16  
17 District and the University of New South Wales, Randwick, NSW, Australia;

18  
19 <sup>12</sup>Department of Radiology, Westmead Hospital, Western Sydney Local Health  
20  
21 District, Westmead, NSW, Australia;

22  
23 <sup>13</sup>Faculty of Health Sciences, The University of Sydney, Sydney, NSW, Australia;

24  
25 <sup>14</sup>Department of Renal Medicine, Bathurst Hospital, Bathurst, NSW, Australia

26  
27 <sup>15</sup>Australasian Kidney Trials Network, University of Queensland at Princess  
28  
29 Alexandra Hospital, Woolloongabba, Queensland, Australia;

30  
31 <sup>16</sup>School of Public Health, The University of Sydney, Sydney, NSW, Australia;

32  
33 <sup>17</sup>Department of Renal Medicine, Canberra Hospital, Garran, ACT, Australia

34  
35 <sup>18</sup>Department of Immunology and Infectious Diseases, John Curtin School of Medical  
36  
37 Research, Australian National University, ACT, Australia;

38  
39 <sup>19</sup>Gosford Nephrology, Gosford, NSW, Australia

40  
41 <sup>20</sup>Department of Renal Medicine, Norwest Private Hospital, Bella Vista, NSW,  
42  
43 Australia;

44  
45 <sup>21</sup>Department of Renal Medicine, Wollongong Hospital, Illawarra Shoalhaven Local  
46  
47 Health District, Wollongong, NSW, Australia;

48  
49 <sup>22</sup>Department of Renal Medicine, Liverpool Hospital, Southwestern Sydney Local  
50  
51 Health District, Liverpool, NSW, Australia;



1  
2  
3 <sup>23</sup>Renal Research, Gosford, NSW, Australia;  
4

5 <sup>24</sup>Department of Renal Medicine, Nepean Hospital, Nepean Blue Mountains Local  
6  
7 Health District, Sydney, Australia;  
8

9 <sup>25</sup>Nepean Clinical School, The University of Sydney Medical School, NSW,  
10  
11 Australia;  
12

13 <sup>26</sup>Department of Nephrology, John Hunter Hospital, Newcastle, NSW, Australia  
14  
15  
16  
17  
18  
19

20  
21 Author for correspondence:  
22

23 Dr. G. Rangan

24 Westmead Institute for Medical Research,  
25

26  
27 Level 5, Centre for Transplant and Renal Research,  
28

29  
30 176 Hawkesbury Road (PO Box 412)  
31

32 Westmead, NSW 2145 AUSTRALIA.  
33

34 Phone: 61-2 8627 3502 Fax: 61-2 9475 1146  
35

36 Email: [g.rangan@sydney.edu.au](mailto:g.rangan@sydney.edu.au)  
37  
38  
39

40  
41 Word count: 5431  
42  
43  
44  
45  
46  
47  
48  
49  
50  
51  
52  
53  
54  
55  
56  
57  
58  
59  
60

**ABSTRACT**

**Introduction:** Maintaining fluid intake sufficient to reduce arginine vasopressin (AVP) secretion has been hypothesised to slow kidney cyst growth in autosomal dominant polycystic kidney disease (ADPKD). However, evidence to support this as a clinical practice recommendation is of poor quality. The aim of the present study is to determine the long-term efficacy and safety of prescribed water intake to prevent the progression of height-adjusted total kidney volume (ht-TKV) in patients with chronic kidney disease (CKD, Stages 1-3) due to ADPKD.

**Methods and analysis:** A multi-centre, prospective, parallel group, open-label, randomised controlled trial will be conducted. Patients with ADPKD (n=180; age≤65 years, estimated glomerular filtration rate (eGFR)  $\geq 30$  ml/min/1.73m<sup>2</sup>) will be randomised (1:1) to either the Control (standard treatment + usual fluid intake) or Intervention (standard treatment + prescribed fluid intake) group. Participants in the Intervention arm will be prescribed an individualised daily fluid intake to reduce urine osmolality to  $\leq 270$  mosmol/kg, and supported with structured clinic and telephonic dietetic review, self-monitoring of urine specific gravity (USG), short message service (SMS) text reminders and internet-based tools. All participants will have 6-monthly follow-up visits, and ht-TKV will be measured by magnetic resonance imaging (MRI) at 0, 18 and 36 months. The primary endpoint is the annual rate of change in ht-TKV as determined by serial renal MRI in Control vs. Intervention groups, from baseline to 3 years. The secondary endpoints are differences between the

1  
2  
3 two groups in systemic AVP activity, renal disease (eGFR, blood pressure, renal  
4 pain), patient adherence, acceptability and safety.

5  
6  
7 **Ethics and Dissemination:** The trial was approved by the Human Research Ethics  
8 Committee, Western Sydney Local Health District. The results will inform clinicians,  
9 patients and policymakers regarding the long-term safety, efficacy and feasibility of  
10 prescribed fluid intake as an approach to reduce kidney cyst growth in patients with  
11 ADPKD.  
12

13  
14  
15  
16  
17  
18 **Trial Registration:** The trial is registered with the Australian New Zealand Clinical  
19 Trials Registry (number 1261-4001-216-606) and endorsed by the Scientific  
20 Committee of the Australasian Kidney Trials Network (AKTN).  
21

## 22 23 24 25 **STRENGTHS AND LIMITATIONS**

- 26  
27 • A major strength of the study is that it has a RCT design and will provide high level  
28 evidence regarding the long-term efficacy of prescribed water intake on the  
29 progression of ADPKD;  
30
- 31  
32 • Other strengths include the duration of follow-up (3 yrs) and the use of Ht- TKV as  
33 the primary outcome measure;  
34
- 35  
36 • Lastly, the study intervention will be implemented using a multi- pronged approach  
37 using self-monitoring, dietetic intervention and mobile-phone technology;  
38
- 39  
40 • The limitations of the study are that the trial intervention is unblinded and is reliant  
41 on the behavioural change to drinking habits of the participant.  
42  
43  
44  
45  
46  
47  
48  
49  
50  
51  
52  
53  
54  
55  
56  
57  
58  
59  
60

## INTRODUCTION

Autosomal dominant polycystic kidney disease (ADPKD) is the most common genetic kidney disease in adults, affecting one in every 2500 individuals, and the cause of kidney failure in 5-10% of the dialysis population worldwide.[1] It is due to heterozygous germ-line mutations in *PKD1* (85%) or *PKD2* (15%) which encode the transmembrane protein polycystin-1 and calcium ion channel polycystin-2 respectively.[1] These proteins maintain the differentiated structure of the nephron during health and disease.[1] The clinical hallmark of ADPKD is the presence of numerous nephron-derived cysts in the kidney, which form in early childhood and grow by 5-10% per year, such that by mid-life the kidney is about five times larger than normal (1.0 kg vs 0.2 kg),[2] causing chronic pain and hypertension. The expanding cysts also compress healthy kidney tissue, leading to progressive chronic kidney disease (CKD) and renal replacement therapy in ~50% of affected people by age of 60 years.[3] Currently there is no 'cure' for ADPKD, and the ideal therapy to stop kidney cyst growth and prevent end stage kidney disease (ESKD) will be one with few side effects, as it will need to be taken lifelong.[4]

Arginine vasopressin (AVP) is a posterior pituitary hormone with a recognised physiological role in maintaining water homeostasis.[5] It is released in response to hypovolaemia and hyperosmolality, and binds to  $V_2$  receptors on the principal cells of the collecting duct in the kidney, causing reabsorption of water from the tubular lumen.[5] Renal cysts are derived from the principal cells of the collecting duct of the nephron.[6,7] However, the epithelial cells lining the cysts respond abnormally to AVP by activating intracellular cyclic adenosine monophosphate (cAMP) signalling

1  
2  
3 which stimulates proliferation and luminal fluid secretion, causing cyst growth. In  
4  
5 rats, the congenital deficiency of AVP completely abrogated renal cyst formation and  
6  
7 growth,[8] providing compelling evidence that AVP has a critical role in cystogenesis  
8  
9 and that its inhibition at an early stage of disease could markedly reduce the risk of  
10  
11 developing ESKD in ADPKD. In this regard, small-molecule vasopressin-receptor  
12  
13 antagonists have been shown to be highly effective in reducing cyst growth in  
14  
15 preclinical studies,[9] and in humans, a randomised controlled trial showed that 3  
16  
17 years of treatment with tolvaptan (a highly specific vasopressin-receptor antagonist)  
18  
19 in early-stages of ADPKD reduced the rate of increase in total kidney volume (TKV)  
20  
21 by 50%, attenuated the decline in estimated glomerular filtration rate (eGFR) by 30%,  
22  
23 and reduced chronic kidney pain.[10]  
24  
25  
26

27 For several years, it has been suggested that the suppression of AVP by  
28  
29 increasing fluid intake could also slow renal cyst growth in ADPKD.[7,11] In support  
30  
31 of the hypothesis, preclinical experiments in the *pck* rat model of PKD showed that  
32  
33 increased water intake reduced kidney enlargement, [12,13] and comparison with  
34  
35 separate studies imply that the efficacy might be similar (but with physiological  
36  
37 differences) to vasopressin receptor antagonists.[14] However, whether this  
38  
39 hypothesis is also true in humans with ADPKD remains unknown. The data available  
40  
41 is limited to a single post-hoc analytical study,[15] two short-term interventional trials  
42  
43 (< 1 week in duration) without control groups,[16,17] and a single, small, quasi-  
44  
45 randomised observational cohort study of twelve months duration which  
46  
47 paradoxically suggested that increased fluid intake increases renal cyst growth.[18]  
48  
49 Consequently, evidence-based clinical care guidelines have not included  
50  
51 recommendations to increase fluid intake in ADPKD patients and the matter remains  
52  
53 controversial in clinical practice.[19] Consistent with this view, ADPKD patients  
54  
55  
56  
57  
58  
59  
60

1  
2  
3 attending a consumer workshop also stated that the role of fluid intake was an  
4  
5 ambiguous area that needed urgent prioritisation in clinical research.[20] An  
6  
7 illustrative comment made by a workshop participant was: “*there needs to be*  
8  
9 *consistency of what doctors say about drinking less or drinking more*”. [20]  
10

11  
12 Two recent clinical studies reported that prescribed fluid intake could be  
13  
14 achieved over a period of 2-4 weeks in ADPKD patients.[21,22] In addition, two  
15  
16 randomised controlled trials are presently underway to address the role of fluid intake  
17  
18 in ADPKD and CKD over a longer duration.[23,24] However, neither of these studies  
19  
20 will specifically address the long-term efficacy of fluid intake on renal cyst growth in  
21  
22 ADPKD. Hence, the aim of the current study is to determine the efficacy and safety of  
23  
24 prescribed water intake to *prevent* the progression of TKV in chronic kidney disease  
25  
26 (CKD, Stages 1-3) due to ADPKD (PREVENT-ADPKD) over a 3-year period. The  
27  
28 trial commenced study activity in 2015 and as of July 2017 75% of the planned target  
29  
30 recruitment has been attained. The current paper provides a summary of the clinical  
31  
32 trial protocol.  
33  
34  
35  
36  
37

## 38 **METHODS AND ANALYSIS**

### 39 **Participants, Design and Registration**

40  
41 This is a prospective, parallel-group, open-label, multi-centre randomised controlled  
42  
43 trial which will enrol 180 participants that meet the inclusion criteria (Table 1). The  
44  
45 planned recruitment period is up to 1.8 years, and began at Westmead Hospital in  
46  
47 December 2015. For participants, the duration of the trial is 3.2 years, including the  
48  
49 Screening Visit and the Run-in, Treatment and Post-Treatment periods (Figure 1).  
50  
51 The trial is registered (Australian New Zealand Clinical Trials Registry number 1261-  
52  
53 4001-216-606) and will be conducted according to Good Clinical Practice and  
54  
55  
56  
57  
58  
59  
60

reported using Consolidated Standards of Reporting Trials (CONSORT) guidelines.[25]

**Table 1.** Inclusion and Exclusion criteria

| <b>Inclusion criteria</b> |                                                                                                                                                                                                                                                                                                                                                                                      |
|---------------------------|--------------------------------------------------------------------------------------------------------------------------------------------------------------------------------------------------------------------------------------------------------------------------------------------------------------------------------------------------------------------------------------|
| 1.                        | Adult patients providing informed consent, aged 18 to 65 years of age                                                                                                                                                                                                                                                                                                                |
| 2.                        | Diagnosis of ADPKD, such as meeting the Pei-Ravine criteria[26]                                                                                                                                                                                                                                                                                                                      |
| 3.                        | eGFR (CKD-EPI) $\geq 30$ mL/min/1.73 m <sup>2</sup> within 6 weeks of randomisation                                                                                                                                                                                                                                                                                                  |
| <b>Exclusion criteria</b> |                                                                                                                                                                                                                                                                                                                                                                                      |
| 1.                        | Safety risk e.g. serum Na <sup>+</sup> <135 mmol/L; requirement for medications with high-risk of precipitating hyponatraemia, such as chronic use of diuretics; medical conditions that require fluid restriction, such as heart failure, chronic liver disease, nephrotic syndrome or generalised oedema; abnormalities in the voiding mechanism; pregnant or breast-feeding women |
| 2.                        | Contraindication to or interference with MRI assessments (e.g. ferromagnetic prostheses, aneurysm clips, severe claustrophobia or other contraindications)                                                                                                                                                                                                                           |
| 3.                        | Risk of non-compliance with trial procedures (e.g. history of non-compliance with medical therapy; history of substance abuse within the previous 2 years; and/or participants who do not complete the required screening tests (24-hour urine, blood tests and baseline MRI) within 12 weeks of the Screening Visit)                                                                |
| 4.                        | Concomitant conditions or treatments likely to confound endpoint assessments (e.g. poorly controlled diabetes, other known causes of CKD, renal cancer, single kidney or severe co-morbid illnesses)                                                                                                                                                                                 |

|    |                                                                        |
|----|------------------------------------------------------------------------|
| 5. | Participation in other clinical trials to slow ADPKD or CKD            |
| 6. | TKV Mayo Clinic Subclass 1A on screening (low risk of progression)[27] |

## Recruitment

Multiple strategies will be used to facilitate recruitment.[28,29] Participants will be identified from nephrologists practicing at the study centres (see below), either through direct referral to the study team (email or verbal communication) or review of clinic letters and (if available) local databases. This approach will be supplemented with presentations at the study centres and adjacent hospitals (such as Royal North Shore, Concord and Royal Prince Alfred Hospitals in Sydney). In addition, participants will also be recruited passively through the internet, digital and print media advertising (listing on the websites of the PKD Foundation of Australia, the Australasian Kidney Trials Network, Clinical Trials Connect and the University of Sydney; letters to Australian nephrologists, news items in the e-bulletins of Australian and New Zealand Society of Nephrology; newspaper advertisements; flyers placed in Renal Clinic waiting rooms in Sydney Hospitals). All identified and interested participants will be discussed with the treating nephrologist for their suitability and pre-screened by telephone to tentatively determine their eligibility and verified using previous imaging and eGFR reports, prior to arranging their study visit.



## Study Centres

The study centres will consist of a combination of University Teaching Hospitals, Medical Research Institutes and Private Consulting Rooms to facilitate the participants' ability to be involved in the trial. The centres will be in Sydney (Westmead Institute for Medical Research, Westmead Hospital, Nepean Hospital, Norwest Private Hospital, Liverpool Hospital, Prince of Wales Hospital, St George Hospital, Mater Private Rooms), NSW Central Coast (Gosford Renal Research, Gosford Nephrology), Newcastle (John Hunter Hospital), Wollongong (Wollongong Hospital), Perth (Sir Charles Gairdner Hospital and the Harry Perkins Institute of Medical Research), Brisbane (Princess Alexandra Hospital) and Canberra (Canberra Hospital).

## Mobile Study Team

To enhance the efficiency of the trial and minimise its impact on the local resources of the study centres, a mobile study team,[30] (based at the Westmead Institute for Medical Research and Westmead Hospital) consisting of research dietitians and a nephrologist, will visit the study centres to conduct research activity. The mobile study team will see several participants on the designated day of the visit, and be supported by local clinical research staff by provision of space and undertaking minor procedures such as blood collection.

## Study Visits (see Figure 1)

1. *Screening Visit (up to Month -1.5)*. If a patient meets all inclusion criteria and no exclusion criteria, he or she will be enrolled in the trial. At this visit, participants will have their medical and ADPKD history reviewed, usual

1  
2  
3 fluid intake and kidney pain (using the HALT-PKD questionnaire)[31]  
4  
5 assessed. A venous blood sample and spot urine sample will also be  
6  
7 collected for DNA analysis and biomarker assessment (see below). Due to  
8  
9 the cost and time required to perform genetic testing, the effect of *PKD*  
10  
11 mutation type on trial outcomes will be assessed retrospectively.  
12  
13 Participants will then be asked to have two 24-hour urine collections and  
14  
15 blood tests (for testing baseline electrolytes, eGFR and osmolality) as an  
16  
17 outpatient at a local pathology collection centre, and a renal MRI (to assess  
18  
19 baseline TKV) will be performed at an external radiology facility. The  
20  
21 period from Screening to Randomisation Visits (up to 12 weeks) will serve  
22  
23 as the run-in period to confirm the participant's willingness to adhere to  
24  
25 study procedures.  
26  
27  
28  
29  
30  
31

32 2. *Randomisation and Baseline Visit (Month 0)*. Follow-up medical and  
33  
34 ADPKD histories will be taken and venous blood and urine samples will be  
35  
36 collected at this visit. Participants randomised to the Control Group will  
37  
38 continue with their usual (*ad libitum*) water intake and standard treatment.  
39  
40 Participants in the Intervention Group will be advised to adjust their daily  
41  
42 water intake for the next 36 months, in addition to continuation of their  
43  
44 standard treatment, and be provided with specific instructions, described in  
45  
46 the section under *Study Intervention (Group B)*.  
47  
48  
49  
50  
51

52 3. *Treatment Period*. The 3-year treatment period includes repeat outpatient  
53  
54 blood and 24-hour urine collections (at 3-monthly intervals in Year 1 and 6-  
55  
56 monthly in Years 2–3), progress MRI scans (at 18 and 36 months) and  
57  
58  
59  
60

1  
2  
3 visits to the study centre every 6 months.  
4  
5  
6

- 7  
8 4. *Follow-up Study Visits (Months 6, 12, 18, 24, 30 and 36)*. Progress medical  
9 and ADPKD histories and further collections of venous blood and urine  
10 will be undertaken at follow-up study visits. Study staff will record  
11 answers to specific questions on adverse events (AEs) and kidney pain  
12 (using the HALT-PKD questionnaire). In both groups, quality of life will  
13 be assessed 6-monthly (Month 0, 6, 12, 18, 24, 30 and 36) and usual fluid  
14 intake will be assessed annually (Month 0, 12, 24 and 36). At the Final  
15 Treatment Visit at Month 36, Intervention Group participants will be  
16 advised that they may return to their previous *ad libitum* water intake.  
17  
18  
19  
20  
21  
22  
23  
24  
25  
26  
27  
28  
29 5. *Post-treatment Study Visit*. This will occur at Month 37 for all participants.  
30  
31  
32  
33  
34

### 35 **Randomisation Procedure**

36  
37 Participants will be randomly allocated in a 1:1 ratio (in permuted blocks of  
38 4) to the Control Group or the Intervention Group, stratified by baseline eGFR (< 60  
39 or  $\geq 60$  mL/min/1.73m<sup>2</sup>). Randomisation and concealed allocation will be performed  
40 with a secure, web-based randomisation service (Randomize.net). The trial  
41 statisticians have generated a validated randomisation list.  
42  
43  
44  
45  
46  
47  
48  
49  
50

### 51 **Study Intervention (Group B)**

52  
53 At the Randomisation/Baseline Visit (Month 0, see Figure 1), the Study Dietitian will  
54 implement the following:  
55  
56  
57  
58  
59  
60

- 1  
2  
3  
4  
5  
6  
7  
8  
9  
10  
11  
12  
13  
14  
15  
16  
17  
18  
19  
20  
21  
22  
23  
24  
25  
26  
27  
28  
29  
30  
31  
32  
33  
34  
35  
36  
37  
38  
39  
40  
41  
42  
43  
44  
45  
46  
47  
48  
49  
50  
51  
52  
53  
54  
55  
56  
57  
58  
59  
60
1. *Calculation of Fluid Prescription.* Participants will be advised to drink a prescribed volume of fluid per day (preferably tap water), based on the free water clearance formula, to reduce their urine osmolality to  $\leq 270$  mosmol/L plus an amount to account for insensible losses (appropriate for climate and daily activity).[32,33] The calculation is as follows:

$$\text{Prescribed Fluid Intake (mL)} = \frac{\text{total solutes (mosmol)}}{270} (\text{mL}) + \text{insensible losses (mL)} [17]$$

*Total solutes (urine osmolality  $\times$  urine volume [mL]) is the mean derived from two 24-hour urine samples collected between the Screening Visit and the Randomisation/Baseline Visit.*

2. *Dietary Counselling.* A high dietary solute load (due to high salt and protein intakes) requires a higher fluid intake to maintain urine dilution.[11] Participants will be educated about the importance of dietary solute intake in determining obligatory urine volume (i.e. the minimum urine volume required to excrete the daily solute load).[34] The Study Dietitian will take a detailed diet history and provide tailored dietary advice to enable participants to achieve and maintain a moderate protein intake (0.75–1.0 g/kg/day) and limit sodium intake to 80–100 mmol/day.[19] If the calculated prescription is more than 3 L per day, the participant will be advised to gradually increase fluid intake until target urine osmolality is reached and focus on reducing dietary solutes to reduce the risk of hyponatraemia.

- 1  
2  
3  
4  
5  
6  
7  
8  
9  
10  
11  
12  
13  
14  
15  
16  
17  
18  
19  
20  
21  
22  
23  
24  
25  
26  
27  
28  
29  
30  
31  
32  
33  
34  
35  
36  
37  
38  
39  
40  
41  
42  
43  
44  
45  
46  
47  
48  
49  
50  
51  
52  
53  
54  
55  
56  
57  
58  
59  
60
3. *Review of Lifestyle and Environmental Factors.* The participant's lifestyle, personal preferences and occupation will be recorded and reviewed when providing individualised techniques for promoting adherence to fluid intake. Participants will be provided with 3 × 1 L re-usable water bottles to help keep track of their fluid intake, and will be encouraged to drink evenly throughout the day and replenish with each episode of nocturia.
  4. *Self-Monitoring of Fluid Intake and Treatment Efficacy.* Aids have been developed to assist participants with self-monitoring, including a paper-based diary or web-based/smartphone compatible tool to self-monitor fluid intake, and urine dipsticks will be provided to record urine specific gravity (USG). Participants will be shown how to read their USG and will be asked to test it during the late afternoon (4–8 pm) at least once daily in the first 2 weeks of the study, at least twice weekly for the first 6 months and then at least monthly for the duration of the study. A USG of  $\leq 1.010$  indicates a spot urine osmolality of  $\leq 270$  mmol/L, meaning that fluid intake in the past few hours has been adequate. Participants will also be briefed on receiving and responding to short message service (SMS) text messages (or emails if they do not own a mobile phone) requesting the results of a late afternoon USG measurement (see below), as well as on the schedule of telephone calls (see below).
  5. *Scheduled Telephone Calls and Follow-up Study Visits.* Participants in the Intervention Group will be contacted by telephone (at Weeks 1, 3 and 6, then monthly in Year 1, and 3-monthly for Years 2–3) and reviewed face-to-face at all study visits by the Study Dietitian to assess compliance with fluid intake, discuss USG results, ensure that blood and urine samples are

1  
2  
3 collected and to record any AEs and new medications commenced. If  
4  
5 necessary, the fluid prescription will be adjusted depending on the results  
6  
7 of progress 24-hour urine osmolality and USG. The Study Dietitian will  
8  
9 monitor compliance with protein and sodium recommendations using 24-  
10  
11 hour recalls at all study visits.  
12

13  
14 6. *Response to SMS Text Messages.* To provide a quantitative measure of  
15  
16 adherence, participants in the Intervention Group will be required to reply  
17  
18 (within 12 hours) to an SMS message requesting the results of a late  
19  
20 afternoon USG. The SMS message will be delivered randomly twice a  
21  
22 week in Months 0–6, then monthly for the duration of the study.  
23

24  
25 7. *Rationale for the Intervention.* Previous trials in patients with recurrent  
26  
27 nephrolithiasis in Italy and Israel have shown that a long-term increase in  
28  
29 fluid intake can be achieved with targeted education provided at clinic  
30  
31 visits alone [35,36] but, for the current study in Australia, telephone  
32  
33 coaching by a dietitian and the above tools are included to boost  
34  
35 compliance and continued participation.[37] A systematic review revealed  
36  
37 that self-monitoring of USG is a critical tool to enhance the implementation  
38  
39 of increased fluid intake in clinical trials.[38] SMS texting is a method  
40  
41 preferred by consumers in health interventions.[39]  
42  
43  
44  
45  
46  
47

### 48 **Standard Treatment**

49  
50 Both study groups will continue to receive the current standard of care for  
51  
52 ADPKD as specified by the treating nephrologist. Hypertension will be treated with  
53  
54 angiotensin-converting enzyme inhibitors or angiotensin receptor blockers as first line  
55  
56 agents. If hypertension remains inadequately controlled, use of additional  
57  
58  
59  
60

1  
2  
3 antihypertensive agents will be at the discretion of the treating nephrologist, but  
4  
5 treatment with diuretics will be contraindicated. The frequency of study visits in the  
6  
7 trial is similar to standard nephrological care in ADPKD with CKD stages 1-3.  
8  
9

### 10 11 **Primary Endpoint**

12  
13 The primary endpoint is the percentage annual change in ht-TKV from  
14  
15 baseline to 36 months as determined by serial MRI. Dialysis-dependent kidney failure  
16  
17 takes decades to develop in ADPKD, making it impractical to use serial changes in  
18  
19 serum creatinine and eGFR for assessing treatment efficacy. Ht-TKV is a highly  
20  
21 sensitive surrogate marker that measures exponential cyst growth, the key parameter  
22  
23 of ADPKD progression, and has been used as a primary endpoint in many pivotal  
24  
25 clinical trials. The longitudinal Consortium for Radiologic Imaging Studies of PKD  
26  
27 (CRISP-I) study established that the rate of increase in TKV is relatively constant  
28  
29 (~5.6%/year) and can be quantified with high precision by MRI (reliability  
30  
31 coefficient, 0.998; mean coefficient of variation, 0.01%).[2] In CRISP-II, adjusting  
32  
33 for height reduced variability in TKV, a baseline ht-TKV value of >600 mL/m  
34  
35 predicted development of CKD Stage 3 over an 8-year period (AUC = 0.84;  
36  
37 sensitivity, 74%; specificity, 75%).[40] The magnitude of the rate of increase in ht-  
38  
39 TKV predicted the risk of ESKD.  
40  
41  
42  
43  
44  
45  
46

### 47 **Secondary Endpoints**

- 48  
49 1. *Systemic AVP Activity.* Markers will be serum copeptin,[5,24] 24-hour urine  
50  
51 osmolality and volume;  
52  
53 2. *Kidney Disease Progression.* Markers will be rate of eGFR decline (0 and 3 to  
54  
55 36+ Months); resting mean arterial pressure; urine albumin to creatinine ratio;  
56  
57  
58  
59  
60

1  
2  
3 and kidney pain as assessed by the HALT-PKD questionnaire;  
4

- 5  
6 3. *Treatment Adherence*. Measured by proportion of the Intervention Group  
7  
8 responding within 12 hours to SMS texts requesting results of the late  
9  
10 afternoon USG; proportion of the Intervention Group with 24-hour urine  
11  
12 osmolality  $\leq 270$  mosmol/L;  
13
- 14 4. *Safety Endpoints*. Measured by proportion of participants with serum  
15  
16  $\text{Na}^+ < 130$  mmol/L; episodes of serious AEs;  
17
- 18 5. *Patient Acceptability*. Measured by a Treatment Acceptability questionnaire  
19  
20 (adapted from Reference[41]) and the proportion of participants withdrawing  
21  
22 from the study;  
23
- 24 6. *Quality of Life*. Measured by the Kidney Disease Quality of Life short form  
25  
26 (KDQOL-SF) 1.3 tool;  
27
- 28 7. *Healthcare Utilisation*. At each study visit participants are asked if have had  
29  
30 any new diagnosis, hospital visits, seen a GP or changed medication since the  
31  
32 previous visit.  
33  
34  
35  
36  
37  
38

39 Study endpoints were developed to ensure that appropriate health economic  
40  
41 analyses can be undertaken at the conclusion of the trial. Future linkage with the  
42  
43 Australian and New Zealand Dialysis and Transplant (ANZDATA) Registry will  
44  
45 enable long-term outcomes (e.g. time to reach ESKD) to be determined with minimal  
46  
47 cost.  
48

49  
50  
51  
52  
53 **Study Measurements** (see Table 2)  
54

- 55 1. *Height-adjusted Total Kidney Volume (Ht-TKV)*. Renal MRI will be  
56  
57 performed three times (at baseline and at Months 18 and 36) during the  
58  
59  
60



1  
2  
3 study to assess the annual rate of change in ht-TKV in the study groups.  
4  
5 MRIs will be performed in the radiology departments of the respective  
6  
7 study centres or an external facility (approved by the Investigators). A  
8  
9 standardised protocol for image acquisition will be utilised,[10] and the  
10  
11 MRI protocol and image quality will be validated in test images.[10] The  
12  
13 MRI scans will be de-identified and encrypted, then analysed at the  
14  
15 Translational PKD Centre at Mayo Clinic, Rochester, Minnesota (USA) by  
16  
17 blinded personnel to quantify TKV. Baseline TKV for each patient will be  
18  
19 determined by performing kidney segmentation semi-automatically on the  
20  
21 T2-weighted MRI utilising the MIROS software package. This algorithm  
22  
23 outputs a complete segmentation after the user quickly defines crude  
24  
25 polygon contours of each kidney every third slice.[42] The interactive  
26  
27 toolkit included in the package is then used to perform quality assurance  
28  
29 and finalise the segmentation on each baseline image. Thereafter, TKV  
30  
31 will be measured in all follow-up T2-weighted MRI scans using an  
32  
33 automated registration-based segmentation technique, as validated  
34  
35 previously.[43] A final quality control check will also be performed on  
36  
37 these follow-up scans using the interactive toolkit. Finally, fractional cyst  
38  
39 volume will be calculated using an automated cyst segmentation technique  
40  
41 along with a final quality check.  
42  
43  
44  
45  
46

- 47 2. *Serum and Urine Electrolytes, Creatinine and Osmolality.* Outpatient  
48 serum and 24-hour urine will be collected at baseline and at Months 3, 6, 9,  
49  
50 12, 18, 24, 30 and 36 for measuring electrolytes, creatinine, urea, urate and  
51  
52 osmolality. In participants from the Intervention Group, additional samples  
53  
54 will be collected at Weeks 3 and 6 for an initial safety check (for  
55  
56  
57  
58  
59  
60

1  
2  
3 hyponatraemia) and for titration of the water prescription. Following the  
4  
5 Last Treatment Visit (Month 36), blood tests will be performed 2 and 4  
6  
7 weeks later and a 24-hour urine collection will be performed 4 weeks later,  
8  
9  
10 in all groups.

- 11  
12 3. *Systemic AVP Activity.* Venous blood will be collected at all study visits to  
13  
14 measure serum copeptin (a pre-pro-hormone that is a stable biomarker for  
15  
16 AVP). Longitudinal studies show that serum copeptin is a determinant of  
17  
18 TKV and eGFR decline in ADPKD[44,45] consistent with the hypothesis  
19  
20 that AVP mediates renal cyst growth. Serum samples will be frozen at  
21  
22  $-80^{\circ}\text{C}$ , and copeptin will be measured in batches using a sandwich  
23  
24 immunoluminometric assay (CT-proAVP Kryptor, B.R.A.H.M.S, Thermo  
25  
26 Fisher Scientific, Germany).
- 27  
28  
29  
30  
31  
32  
33  
34  
35  
36  
37  
38  
39  
40  
41  
42  
43  
44  
45  
46  
47  
48  
49  
50  
51  
52  
53  
54  
55  
56  
57  
58  
59  
60

**Table 2.** Schedule of Assessments

|                                                                              | Weeks  |   |                |                |   |    |    |    |    |    |    |    |     |     |     |     |     | Post-Treatment period |     |
|------------------------------------------------------------------------------|--------|---|----------------|----------------|---|----|----|----|----|----|----|----|-----|-----|-----|-----|-----|-----------------------|-----|
|                                                                              | Screen | 0 | 1              | 3              | 6 | 12 | 26 | 36 | 52 | 64 | 78 | 90 | 104 | 116 | 130 | 142 | 156 | 158                   | 160 |
| <b>Study Visits (SVs)</b>                                                    | 1      | 2 |                |                |   | 3  |    | 4  |    | 5  |    | 6  |     | 7   |     | 8   |     | 9                     |     |
| <b>Visits to External Pathology Collection Centre<sup>1</sup></b>            | 1      | 2 | 3 <sup>2</sup> | 4 <sup>2</sup> | 5 | 6  | 7  | 8  |    | 9  |    | 10 |     | 11  |     | 12  | 13  | 14                    |     |
| <b>Scheduled Telephone Call from Trial Staff (Group B)<sup>3</sup></b>       |        |   | X              | X              | X | X  | X  | X  | X  | X  | X  | X  | X   | X   | X   | X   | X   | X                     | X   |
| <b>Procedures and Evaluations</b>                                            |        |   |                |                |   |    |    |    |    |    |    |    |     |     |     |     |     |                       |     |
| Written informed consent                                                     | X      |   |                |                |   |    |    |    |    |    |    |    |     |     |     |     |     |                       |     |
| Inclusion and exclusion criteria                                             | X      | X |                |                |   |    |    |    |    |    |    |    |     |     |     |     |     |                       |     |
| Randomisation <sup>4</sup>                                                   |        | X |                |                |   |    |    |    |    |    |    |    |     |     |     |     |     |                       |     |
| Demographics(age, race, gender, education level and health insurance status) | X      |   |                |                |   |    |    |    |    |    |    |    |     |     |     |     |     |                       |     |
| Medical/ADPKD history                                                        | X      |   |                |                |   |    |    |    |    |    |    |    |     |     |     |     |     |                       |     |

<sup>1</sup> The patients are to visit an External Pathology Collection Centre for blood and urine sample collection.

<sup>2</sup> Group B patients only for safety check and titration of water prescription

<sup>3</sup> Patients in Group B will receive scheduled telephone calls from the Study Nurse (with the Dietitian, as needed) to review changes in health, fluid intake, urine SG, laboratory results, Adverse event (AE), and provided coaching to alter water intake (if needed). These calls will be made at Week 1, 3, 6, and then monthly in Year 1 and 3-monthly in Years 2-3 (and as required). Patients in Group B will only be contacted if the pathology results meet the criteria for an AE.

<sup>4</sup> Patients randomised to Group B will receive specific advice on the amount of fluid required per day to reduce the urine osmolality to  $\leq 270$  mosmol/kg. Patients in Group B will be asked to self-monitor their urine specific gravity (SG) regularly at home using urine dipstick (provided to the patients), and adherence to the intervention will be quantified by patient responses to SMS text, sent twice weekly during months 0-6 and then monthly for the duration of the study, asking for the results of that day's urine SG.

1  
2  
3  
4  
5  
6  
7  
8  
9  
10  
11  
12  
13  
14  
15  
16  
17  
18  
19  
20  
21  
22  
23  
24  
25  
26  
27  
28  
29  
30  
31  
32  
33  
34  
35  
36  
37  
38  
39  
40  
41  
42  
43  
44  
45  
46  
47  
48  
49

|                                                                        | Weeks  |   |   |                |                |    |    |    |    |    |    |    |     |     |     |     |     | Post-Treatment period |     |
|------------------------------------------------------------------------|--------|---|---|----------------|----------------|----|----|----|----|----|----|----|-----|-----|-----|-----|-----|-----------------------|-----|
|                                                                        | Screen | 0 | 1 | 3              | 6              | 12 | 26 | 36 | 52 | 64 | 78 | 90 | 104 | 116 | 130 | 142 | 156 | 158                   | 160 |
| <b>Study Visits (SVs)</b>                                              | 1      | 2 |   |                |                |    | 3  |    | 4  |    | 5  |    | 6   |     | 7   |     | 8   |                       | 9   |
| <b>Visits to External Pathology Collection Centre<sup>1</sup></b>      | 1      | 2 |   | 3 <sup>2</sup> | 4 <sup>2</sup> | 5  | 6  | 7  | 8  |    | 9  |    | 10  |     | 11  |     | 12  | 13                    | 14  |
| <b>Scheduled Telephone Call from Trial Staff (Group B)<sup>3</sup></b> |        |   | X | X              | X              | X  | X  | X  | X  | X  | X  | X  | X   | X   | X   | X   | X   | X                     | X   |
| <b>Procedures and Evaluations</b>                                      |        |   |   |                |                |    |    |    |    |    |    |    |     |     |     |     |     |                       |     |
| Concomitant medications                                                | X      | X | X | X              | X              | X  | X  | X  | X  | X  | X  | X  | X   | X   | X   | X   | X   | X                     | X   |
| Adverse events                                                         |        | X | X | X              | X              | X  | X  | X  | X  | X  | X  | X  | X   | X   | X   | X   | X   | X                     | X   |
| Kidney Pain Assessment                                                 | X      |   |   |                |                |    | X  |    | X  |    | X  |    | X   |     | X   |     | X   |                       | X   |
| Quality of Life Assessment                                             |        | X |   |                |                |    | X  |    | X  |    | X  |    | X   |     | X   |     | X   |                       | X   |
| Qualitative evaluation (Group B)                                       |        |   |   |                |                |    | X  |    | X  |    |    |    | X   |     |     |     | X   |                       |     |
| Patient acceptability question (Group B)                               |        |   |   |                |                |    | X  |    | X  |    |    |    | X   |     |     |     | X   |                       |     |
| Dietary and Fluid Intake <sup>5</sup>                                  | X      | X |   |                |                |    | X  |    | X  |    | X  |    | X   |     | X   |     | X   |                       | X   |
| Vital signs (heart rate, abdominal girth), weight                      | X      | X |   |                |                |    | X  |    | X  |    | X  |    | X   |     | X   |     | X   |                       | X   |
| Height                                                                 | X      |   |   |                |                |    |    |    |    |    |    |    |     |     |     |     |     |                       |     |

<sup>5</sup> All patients will conduct two 24-hour urine collections and record their fluid intake for those two days prior to Baseline Visit. The Study Dietitian will provide Group B patients with diet and fluid assessments and review during all study visits to ensure prescribed fluid intake is achieved and to validate a fluid intake tool.

|                                                                        | Weeks          |   |   |                |                |                |                |                |                |    |                |    |                |     |                |     |                | Post-Treatment period |                |
|------------------------------------------------------------------------|----------------|---|---|----------------|----------------|----------------|----------------|----------------|----------------|----|----------------|----|----------------|-----|----------------|-----|----------------|-----------------------|----------------|
|                                                                        | Screen         | 0 | 1 | 3              | 6              | 12             | 26             | 36             | 52             | 64 | 78             | 90 | 104            | 116 | 130            | 142 | 156            | 158                   | 160            |
| <b>Study Visits (SVs)</b>                                              | 1              | 2 |   |                |                |                | 3              |                | 4              |    | 5              |    | 6              |     | 7              |     | 8              |                       | 9              |
| <b>Visits to External Pathology Collection Centre<sup>1</sup></b>      | 1              | 2 |   | 3 <sup>2</sup> | 4 <sup>2</sup> | 5              | 6              | 7              | 8              |    | 9              |    | 10             |     | 11             |     | 12             | 13                    | 14             |
| <b>Scheduled Telephone Call from Trial Staff (Group B)<sup>3</sup></b> |                |   | X | X              | X              | X              | X              | X              | X              | X  | X              | X  | X              | X   | X              | X   | X              | X                     | X              |
| <b>Procedures and Evaluations</b>                                      |                |   |   |                |                |                |                |                |                |    |                |    |                |     |                |     |                |                       |                |
| Office BP                                                              | X              | X |   |                |                |                | X              |                | X              |    | X              |    | X              |     | X              |     | X              |                       | X              |
| Physical examination                                                   | X              |   |   |                |                |                |                |                |                |    |                |    |                |     |                |     |                |                       |                |
| Urinalysis (dipstick)                                                  | X              | X |   |                |                |                | X              |                | X              |    | X              |    | X              |     | X              |     | X              |                       | X              |
| TKV (by MRI)                                                           | X              |   |   |                |                |                |                |                |                |    | X              |    |                |     |                |     | X              |                       |                |
| 24-hour urine osmolality (External Pathology Centre)                   | X <sup>6</sup> |   |   |                |                | X <sup>7</sup> | X <sup>8</sup> | X <sup>7</sup> | X <sup>8</sup> |    | X <sup>8</sup> |    | X <sup>8</sup> |     | X <sup>8</sup> |     | X <sup>6</sup> |                       | X <sup>8</sup> |
| Routine blood tests (External Pathology Centre)                        | X              | X |   | X              | X              | X              | X              | X              | X              |    | X              |    | X              |     | X              |     | X              | X                     | X              |
| Serum copeptin                                                         | X              | X |   |                |                |                | X              |                | X              |    | X              |    | X              |     | X              |     | X              |                       | X              |
| DNA for <i>PKD</i> gene analysis (blood sampling) <sup>9</sup>         | X              |   |   |                |                |                |                |                |                |    |                |    |                |     |                |     |                |                       |                |

<sup>6</sup> To be collected following the Screening Visit and prior to the Final Visit (2 collections each)

<sup>7</sup> To be collected between study visits (one collection only)

<sup>8</sup> To be collected prior to the study visit (one collection only)

<sup>9</sup> To be collected at Screening for *PKD* gene analysis

1  
2  
3  
4  
5  
6  
7  
8  
9  
10  
11  
12  
13  
14  
15  
16  
17  
18  
19  
20  
21  
22  
23  
24  
25  
26  
27  
28  
29  
30  
31  
32  
33  
34  
35  
36  
37  
38  
39  
40  
41  
42  
43  
44  
45  
46  
47  
48  
49

|                                                                        | Weeks  |   |   |                |                |    |    |    |    |    |    |    |     |     |     |     |     | Post-Treatment period |     |
|------------------------------------------------------------------------|--------|---|---|----------------|----------------|----|----|----|----|----|----|----|-----|-----|-----|-----|-----|-----------------------|-----|
|                                                                        | Screen | 0 | 1 | 3              | 6              | 12 | 26 | 36 | 52 | 64 | 78 | 90 | 104 | 116 | 130 | 142 | 156 | 158                   | 160 |
| <b>Study Visits (SVs)</b>                                              | 1      | 2 |   |                |                |    | 3  |    | 4  |    | 5  |    | 6   |     | 7   |     | 8   |                       | 9   |
| <b>Visits to External Pathology Collection Centre<sup>1</sup></b>      | 1      | 2 |   | 3 <sup>2</sup> | 4 <sup>2</sup> | 5  | 6  | 7  | 8  |    | 9  |    | 10  |     | 11  |     | 12  | 13                    | 14  |
| <b>Scheduled Telephone Call from Trial Staff (Group B)<sup>3</sup></b> |        |   | X | X              | X              | X  | X  | X  | X  | X  | X  | X  | X   | X   | X   | X   | X   | X                     | X   |
| <b>Procedures and Evaluations</b>                                      |        |   |   |                |                |    |    |    |    |    |    |    |     |     |     |     |     |                       |     |
| Urine and blood spot samples (biomarkers) <sup>10</sup>                | X      | X |   |                |                |    | X  |    | X  |    | X  |    | X   |     | X   |     | X   |                       | X   |

<sup>10</sup> To be collected at all Study Visits for exploratory renal biomarkers (stored at -80°C).

### Measures to Reduce Bias

The trial intervention is an unblinded behavioural modification. Bias and contamination could be introduced by a participant's expectations and prior knowledge of the hypothesised role of fluid intake in ADPKD. To minimise the effect of this problem:

- Both groups will be educated about the fact that fluid requirement in ADPKD is not known and that the intervention may be equally beneficial. The patient information consent form has been written in an objective, neutral manner to accurately reflect current evidence, and does not discuss the hypothesised benefits of fluid intake in ADPKD.
- Appointments will be scheduled for the two study groups at different times of the day to minimise the chance of Control Group participants meeting the Intervention Group in the waiting room.
- Outcome assessors will be blinded to participants' treatment allocations.

### Sample Size Calculation

In longitudinal data from the CRISP-II cohort, the average rate of increase in ht-TKV was 5.5% per year (SD, 3.8% per year;  $n = 201$ ; 8-year follow-up). Preclinical and clinical studies using pharmacological inhibition or adequate hydration to inhibit ADH-mediated cyst growth resulted in similar treatment efficacy of ~50% lesser increase in kidney volume.[10] In this trial, a more modest (but still clinically important) treatment effect of 35% is nominated. Using these assumptions, a total sample size of 150 will have 87% power to detect a difference in ht-TKV of 1.9% per year, using a 2-sided test and a 0.05 level of significance. Taking into

1  
2  
3 account the possibility of 15% dropouts, our aim is to include 180 participants ( $n = 90$   
4 per arm).  
5  
6

7 The estimation of dropouts was based on experience from previous clinical  
8 trials in ADPKD. Furthermore, it was suspected that there would be significant  
9 interest for participants to remain in this study due to the low risk of adverse events  
10 with the intervention; as well as the strong interest and motivation expressed by PKD  
11 patients at the study centres, in part due to genetic nature of the disease and the  
12 paucity of opportunities for clinical research in PKD in the past. In reality, however,  
13 the exact proportion of subjects that dropout and/or withdraw from the intervention  
14 (protocol deviation) will not be known until the trial has concluded, and is a  
15 secondary outcome measure to assess the intervention's efficacy.  
16  
17  
18  
19  
20  
21  
22  
23  
24  
25  
26  
27  
28  
29

### 30 **Statistical Methods and Data Management**

31  
32 Intention-to-treat principles will be followed. Patient characteristics (age, sex,  
33 ht-TKV, eGFR) will be compared at baseline, and analysis of covariance will be used  
34 to analyse  $\log_{10}$  ht-TKV at Months 18 and 36, with baseline  $\log_{10}$  ht-TKV as the  
35 covariate. Assumptions of the analysis of covariance of normally distributed residuals  
36 and constant variance will be assessed with normal probability plots and residual vs  
37 fitted plots. Linear mixed-effects models will be used to test the interaction between  
38 treatment groups and time, if assumptions of equal covariance between times cannot  
39 be guaranteed. The adherence distribution will be constructed in the intervention arm  
40 by using the proportion of times a subject responds to the SMS. Outcome measure  
41 will be transformed to appropriate normality if required, and the chi-squared or Fisher  
42 exact test will be used to test the association between categorical variables. The Data  
43 Management Plan and the Electronic Case Report Forms (eCRFs) have been  
44  
45  
46  
47  
48  
49  
50  
51  
52  
53  
54  
55  
56  
57  
58  
59  
60



1  
2  
3 developed in the OpenClinica<sup>®</sup> platform, harmonised using NIH-CDISC terminology  
4  
5 for ADPKD to enable future data sharing.[46] The Research Data Storage Plan has  
6  
7 been approved by University of Sydney.  
8  
9

### 10 11 12 **Process Evaluation of the Intervention**

13  
14 To understand patient experiences and attitudes about the Intervention  
15  
16 (prescribed water intake), a Process Evaluation sub-study will be conducted, using  
17  
18 methods previously described.[47] Measures assessed will include the frequency,  
19  
20 timing and difficulties experienced with intervention and the intervention tools  
21  
22 (telephone coaching, USG, SMS, water bottles, water and diet guidebook, website).  
23  
24 The data will be collected using a questionnaire during study visits, and a semi-  
25  
26 structured telephone interview will be conducted in a minimum of 30 Intervention  
27  
28 Group participants following the Final Study Visit. Thematic analysis will identify  
29  
30 key facilitators and barriers to intervention uptake.  
31  
32  
33  
34  
35  
36  
37  
38  
39

### 40 41 42 **Economic Evaluation**

43  
44 A trial-based economic evaluation, from the perspective of the health funder  
45  
46 will be conducted. Information on quality-adjusted life years (QALYs) will be  
47  
48 collected using the short form 6D (SF6D) calculated from the KDQOL (SF-1.3). Self-  
49  
50 reported health care utilisation and costs will be collected at routine clinic visits and  
51  
52 intervention costs (staff, training, capital costs and consumables) will also be  
53  
54 included. Using the mean costs and the mean health outcomes in each trial arm, the  
55  
56 incremental costs per QALY of the Intervention Group compared with the Control  
57  
58 Group will be calculated; results will be plotted on a cost-effectiveness plane.  
59  
60 Bootstrapping will be used to estimate a distribution around costs and health

1  
2  
3 outcomes, and to calculate the confidence intervals around the incremental cost-  
4 effectiveness ratios. One-way and multi-way sensitivity analyses will be conducted  
5 around key variables. A cost-effectiveness acceptability curve will be plotted to  
6 provide information about the probability that the intervention is cost-effective, given  
7 willingness to pay for each additional QALY gained.  
8  
9  
10  
11  
12

### 13 14 15 16 **Comparison of prescribed water intake with pharmacological suppression of** 17 **AVP** 18 19

20  
21 It would be important for consumers, policy-makers and other stakeholders to  
22 be informed of the direct comparative treatment effects of suppressing the AVP  
23 pathway in ADPKD using prescribed water intake or by pharmacological inhibition  
24 with a vasopressin receptor antagonist. In this regard, the addition of a third trial arm  
25 to compare prescribed water intake with open-label treatment with a vasopressin type  
26 2 receptor antagonist (such as tolvaptan, Otsuka Pharmaceuticals; or Lixivaptan,  
27 Palladio Biosciences) in the PREVENT-ADPKD study was considered. However, the  
28 cost of study drug was prohibitive for government grant funding (~\$A15M assuming  
29 treatment with tolvaptan at up to 90/30 mg dosage for n=90 participants for 3 years),  
30 and commercial sponsorship has not been achieved. Therefore, the Investigators will  
31 conduct a modelled economic evaluation vs tolvaptan, using trial costs and outcomes,  
32 supplemented with best available published evidence to consider costs and outcomes  
33 over a longer time horizon to account for future benefits in terms of delayed  
34 commencement of dialysis, quality of life and life expectancy. One-way and multi-  
35 way sensitivity analyses will be conducted around key variables and a probabilistic  
36 sensitivity analysis will estimate uncertainty in all parameters.  
37  
38  
39  
40  
41  
42  
43  
44  
45  
46  
47  
48  
49  
50  
51  
52  
53  
54  
55  
56  
57  
58  
59  
60

### **Data Monitoring Safety Board (DSMB)**

Prescribed fluid intake is considered a safe treatment. The risk of a serious AE related to hyponatraemia is expected to be very low in the study population (< 1:100,000), however, to mitigate this, serum sodium concentrations will be monitored regularly throughout the trial. An independent DSMB has been appointed to monitor the safety and conduct of this trial. Specific aspects that will be reviewed include recruitment rate and losses to follow-up, data quality, compliance with the protocol by participants and investigators, evidence for treatment harm (treatment group differences in SAEs), protocol modifications and continuing appropriates of participant information. The DSMB Charter was ratified in October 2016 and the first DSMB meeting occurred in December 2016.

### **Trial Monitoring**

The monitoring of the trial will be performed independently by the Australasian Kidney Trials Network using a combination of remote-monitoring tools and site visits.

### **Study Recruitment, Retention and Study Limitations**

As discussed earlier, to achieve the target recruitment and maintain retention, multiple recruitment strategies including presentations to local nephrologists, media advertisement and engagement of multiple sites for participants' convenience to attend study visits will be performed. The individualised nature of the study treatment and regular direct participant contact are key to the retention of participants.[48] There are no competing studies in ADPKD in the region of the study centres, and regulatory approval of tolvaptan for use in ADPKD has been attained in Europe,

1  
2  
3 Canada and Japan, but not in Australia and the United States of America, and  
4  
5 therefore will not affect recruitment.[49]  
6

7 The study intervention (prescribed fluid intake) is reliant on the behavioural  
8  
9 change to drinking habits of the participant to reach 24-hour urine osmolality  $\leq 270$   
10  
11 mosmol/L. The tailored intervention with a variety of supporting tools as described  
12  
13 under *Study intervention (Group B)* adopts a similar model to other successful long-  
14  
15 term behaviour change interventions.[39,50] However, due to the nature of the  
16  
17 western diet, adherence to the trial intervention (both prescribed water intake and  
18  
19 limitation of dietary salt and protein restriction) can be difficult even with intensive  
20  
21 dietary counselling. Progress results from 24-hour urine volume, osmolality and  
22  
23 sodium will be monitored to assess compliance of Group B participants to the trial  
24  
25 intervention. Additionally, bias and contamination could be introduced by the  
26  
27 patient's expectations and prior knowledge of the hypothesised role of fluid intake in  
28  
29 ADPKD, as discussed earlier. Finally, another limitation of the study is that renal  
30  
31 function will be estimated by the CKD-EPI equation and it is known that this may not  
32  
33 reliably predict longitudinal changes in ADPKD patients,[51] which is one of the  
34  
35 principal reasons why TKV has been used as the primary outcome measure.  
36  
37  
38  
39  
40  
41  
42

### 43 **Proposed Timeline and Current Status of the Trial**

44  
45 The study has been in the development phase from 2012-15, and trial  
46  
47 recruitment commenced on 9<sup>th</sup> December 2015 (see Table 3). In 2016, the model of a  
48  
49 mobile research team was implemented and the active study centres included  
50  
51 Westmead, Nepean and Norwest Private Hospitals in Western Sydney and Gosford  
52  
53 Renal Research on the NSW Central Coast. In 2017, additional study centres  
54  
55  
56  
57  
58  
59  
60

commenced, and as of July 2017, 75% of the intended recruitment has been completed and 100% recruitment is anticipated by the end of 2017.

**Table 3.** Proposed timeline of the PREVENT-ADPKD Trial

| <b>Year</b>    | <b>Milestone</b> ( <i>italics denote milestone has been completed</i> )                                                                                                                                                                                                                                                                                                                             |
|----------------|-----------------------------------------------------------------------------------------------------------------------------------------------------------------------------------------------------------------------------------------------------------------------------------------------------------------------------------------------------------------------------------------------------|
| <b>2012–15</b> | <i>Study protocol developed (Version 4); Australian and New Zealand Clinical Trial registration; lead-site ethics committee approval; trial endorsed by AKTN; data and biostatistical management plan developed; DSMB appointed; randomisation list and electronic case report forms (eCRFs) finalised; recruitment at Westmead Hospital started; Intervention Group supporting tools developed</i> |
| <b>2016</b>    | <i>Commenced recruitment at Norwest Private Hospital, Nepean Hospital and Gosford Renal Research<br/>50% planned recruitment completed</i>                                                                                                                                                                                                                                                          |
| <b>2017</b>    | <i>Commence recruitment at other Australian sites<br/>75% recruitment completed in July 2017<br/>Plan to complete recruitment at the end of 2017</i>                                                                                                                                                                                                                                                |
| <b>2018–19</b> | <i>Follow-up of study participants</i>                                                                                                                                                                                                                                                                                                                                                              |
| <b>2020-21</b> | <i>Last participant follow-up<br/>Study close-out, data analysis; report key findings</i>                                                                                                                                                                                                                                                                                                           |

## Outcomes and Significance

This trial will determine if fluid intake prescribed to maintain isotonic urine (implemented by coaching, SMS text reminders and self-monitoring of USG by dipstick) reduces the progression of TKV in CKD Stages 1-3 due to ADPKD. While a negative result of a properly performed study will be significant in that it will settle the controversy regarding fluid intake in ADPKD, a positive study result will provide an inexpensive, widely generalisable and safe approach to slow renal cyst growth, and one that could be easily taken up in clinical practice and well-tolerated by consumers.[52] In the best-case scenario, if prescribed fluid intake is found to reduce the annualised rate of increase in TKV by 50%, the development of ESKD could be delayed by 6.5 years and life expectancy extended by 2.6 years,[53] at a negligible cost over standard treatment, but resulting in considerable cost savings for future treatments of ESKD. Even at lower efficacy this treatment option will be extremely good value for money and this is of vital importance in low-income countries where access to novel drugs and chronic dialysis are restricted due to lack of affordability and availability. However, if the hypothesis is proven, the largest impact will be in children and at-risk individuals with ADPKD (where its introduction in early life could potentially prevent the onset of ESKD).

## ETHICS AND DISSEMINATION

The trial was approved by the Human Research Ethics Committee of the Western Sydney Local Health District in 2014. The results will be submitted to national and international conferences and peer-reviewed medical journals for consideration of publication, after the last participant has completed the final study visit and/or in the event of early termination of the trial for any reason.

## ACKNOWLEDGEMENTS

The study protocol was reviewed by the Scientific Committee of the AKTN and the NHMRC Grant Review Panels (2013, 2014, 2015, 2016) who provided feedback on the study design. The authors thank Dr. William Clark and Dr. Louise Moist (Division of Nephrology, London Health Sciences Centre, Canada) and Dr. Hakam Gharbi (Danone Nutricia) for helpful discussions on the study protocol.

## AUTHOR CONTRIBUTIONS

All authors contributed and developed the study protocol. The rationale and hypothesis for the trial arose from reviews and pilot studies in humans authored by JGG and supported by the results of the TEMPO 251 clinical trial. GR developed the initial version of the study protocol with JGG, DCH, VL and KS. AW, MAF and AR contributed to the implementation of the intervention. KB provided initial biostatistical advice and suggested using SMS texting as a potential measure of compliance in the control group. JH and PM provided biostatistical advice and developed the biostatistical plan. JC developed eCRF and data management protocols. KH and MH developed the protocol for health economic analysis. SF, TP, VT, BE, TJK and ME developed protocols on analysis of TKV by MRI. DJ and CH provided input on trial oversight and overall management. SC, SB, NB, IH, SJ, JM, CM, AP, SDR, EV provided additional input into the study protocol.

## FUNDING STATEMENT

The development and commencement of the trial was funded by University of Sydney Bridging Grants (2014, 2016), Westmead Medical Research Foundation, the Western

1  
2  
3 Sydney Local Health District and an investigator-initiated research grant from  
4  
5 Danone Research (France).  
6  
7  
8

### 9 10 **COMPETING INTEREST STATEMENT**

11 The study protocol was developed independently by the authors listed of this  
12 manuscript. GR is the sole principal investigator listed on the grant received from  
13 Danone Research to conduct this trial. The grant was awarded in December 2015 and  
14 is being administered by the study sponsor (Western Sydney Local Health District).  
15 GR has received travel support from Danone Research to attend an international  
16 meeting on hydration (2016). No other authors have competing interests to declare.  
17  
18  
19  
20  
21  
22  
23  
24  
25  
26

### 27 **REFERENCES**

- 28 1. Rangan GK, Lopez-Vargas P, Nankivell BJ, et al. Autosomal Dominant Polycystic  
29 Kidney Disease: A Path Forward. *Semin Nephrol* 2015;35(6):524-37 doi:  
30 10.1016/j.semnephrol.2015.10.002 [published Online First: 22 December  
31 2015].
- 32 2. Grantham JJ, Torres VE, Chapman AB, et al. Volume progression in polycystic  
33 kidney disease. *N Engl J Med* 2006;354(20):2122-30 doi:  
34 10.1056/NEJMoa054341 [published Online First: October 2005].
- 35 3. Rangan GK, Shtangey V, McDonald S. Characteristics and survival of end-stage  
36 renal failure patients with PKD. *Nephrology (Carlton)* 2005;10(Suppl  
37 3):A403.
- 38 4. Myint TM, Rangan GK, Webster AC. Treatments to slow progression of autosomal  
39 dominant polycystic kidney disease: systematic review and meta-analysis of  
40 randomized trials. *Nephrology (Carlton)* 2014;19(4):217-26 doi:  
41 10.1111/nep.12211 [published Online First: 25 January 2014].
- 42 5. Christ-Crain M, Fenske W. Copeptin in the diagnosis of vasopressin-dependent  
43 disorders of fluid homeostasis. *Nat Rev Endocrinol* 2016;12(3):168-76 doi:  
44 10.1038/nrendo.2015.224 [published Online First: 22 January 2016].
- 45 6. Bankir L, Bouby N, Ritz E. Vasopressin: a novel target for the prevention and  
46 retardation of kidney disease? *Nat Rev Nephrol* 2013;9(4):223-39 doi:  
47 10.1038/nrneph.2013.22 [published Online First: 26 February 2013].
- 48 7. Torres VE, Bankir L, Grantham JJ. A case for water in the treatment of polycystic  
49 kidney disease. *Clin J Am Soc Nephrol* 2009;4(6):1140-50 doi:  
50 10.2215/CJN.00790209 [published Online First: May 2009].
- 51 8. Wang X, Wu Y, Ward CJ, et al. Vasopressin directly regulates cyst growth in  
52 polycystic kidney disease. *J Am Soc Nephrol* 2008;19(1):102-08 doi:  
53 10.1681/ASN.2007060688 [published Online First: 21 November 2007].  
54  
55  
56  
57  
58  
59  
60



- 1  
2  
3 9. Gattone VH, 2nd, Wang X, Harris PC, et al. Inhibition of renal cystic disease  
4 development and progression by a vasopressin V2 receptor antagonist. *Nat*  
5 *Med* 2003;9(10):1323-26 doi: 10.1038/nm935 [published Online First: 21  
6 September 2003].
- 7  
8 10. Torres VE, Chapman AB, Devuyst O, et al. Tolvaptan in patients with autosomal  
9 dominant polycystic kidney disease. *N Engl J Med* 2012;367(25):2407-18 doi:  
10 10.1056/NEJMoa1205511 [published Online First: 3 November 2012].
- 11 11. Wang CJ, Grantham JJ, Wetmore JB. The medicinal use of water in renal disease.  
12 *Kidney Int* 2013;84(1):45-53 doi: 10.1038/ki.2013.23 [published Online First:  
13 20 February 2013].
- 14 12. Hopp K, Wang X, Ye H, et al. Effects of hydration in rats and mice with  
15 polycystic kidney disease. *Am J Physiol Renal Physiol* 2015;308(3):F261-66  
16 doi: 10.1152/ajprenal.00345.2014 [published Online First: 10 December  
17 2014].
- 18 13. Nagao S, Nishii K, Katsuyama M, et al. Increased water intake decreases  
19 progression of polycystic kidney disease in the PCK rat. *J Am Soc Nephrol*  
20 2006;17(8):2220-27 doi: 10.1681/ASN.2006030251 [published Online First:  
21 28 June 2006].
- 22 14. Wang X, Gattone V, 2nd, Harris PC, et al. Effectiveness of vasopressin V2  
23 receptor antagonists OPC-31260 and OPC-41061 on polycystic kidney disease  
24 development in the PCK rat. *J Am Soc Nephrol* 2005;16(4):846-51 doi:  
25 10.1681/ASN.2004121090 [published Online First: 23 February 2005].
- 26 15. Hebert LA, Greene T, Levey A, et al. High urine volume and low urine osmolality  
27 are risk factors for faster progression of renal disease. *Am J Kidney Dis*  
28 2003;41(5):962-71.
- 29 16. Barash I, Ponda MP, Goldfarb DS, et al. A pilot clinical study to evaluate changes  
30 in urine osmolality and urine cAMP in response to acute and chronic water  
31 loading in autosomal dominant polycystic kidney disease. *Clin J Am Soc*  
32 *Nephrol* 2010;5(4):693-97 doi: 10.2215/CJN.04180609 [published Online  
33 First: February 2010].
- 34 17. Wang CJ, Creed C, Winklhofer FT, et al. Water prescription in autosomal  
35 dominant polycystic kidney disease: a pilot study. *Clin J Am Soc Nephrol*  
36 2011;6(1):192-97 doi: 10.2215/CJN.03950510 [published Online First:  
37 September 2010].
- 38 18. Higashihara E, Nutahara K, Tanbo M, et al. Does increased water intake prevent  
39 disease progression in autosomal dominant polycystic kidney disease?  
40 *Nephrol Dial Transplant* 2014;29(9):1710-19 doi: 10.1093/ndt/gfu093  
41 [published Online First: 15 April 2014].
- 42 19. Campbell KL, Rangan GK, Lopez-Vargas P, et al. KHA-CARI Autosomal  
43 Dominant Polycystic Kidney Disease Guideline: Diet and Lifestyle  
44 Management. *Semin Nephrol* 2015;35(6):572-81 e17 doi:  
45 10.1016/j.semnephrol.2015.10.008 [published Online First: 22 December  
46 2015].
- 47 20. Tong A, Tunnicliffe DJ, Lopez-Vargas P, et al. Identifying and integrating  
48 consumer perspectives in clinical practice guidelines on autosomal-dominant  
49 polycystic kidney disease. *Nephrology (Carlton)* 2016;21(2):122-32 doi:  
50 10.1111/nep.12579 [published Online First: 31 July 2015].
- 51 21. Taylor JM, Hamilton-Reeves JM, Sullivan DK, et al. Diet and polycystic kidney  
52 disease: A pilot intervention study. *Clin Nutr* 2015 doi:  
53 10.1016/j.clnu.2016.01.003 [published Online First: 11 January 2016].  
54  
55  
56  
57  
58  
59  
60

22. Amro OW, Paulus JK, Noubary F, et al. Low-Osmolar Diet and Adjusted Water Intake for Vasopressin Reduction in Autosomal Dominant Polycystic Kidney Disease: A Pilot Randomized Controlled Trial. *Am J Kidney Dis* 2016;68(6):882-91 doi: 10.1053/j.ajkd.2016.07.023 [published Online First: 20 September 2016].
23. ClinicalTrials.gov. A Randomised Feasibility Trial of High Water Intake in Polycystic Kidney Disease (DRINK) [Internet] 12 October 2016 2016. <https://clinicaltrials.gov/ct2/show/nct02933268>.
24. Sontrop JM, Huang S-H, Garg AX, et al. Effect of increased water intake on plasma copeptin in patients with chronic kidney disease: results from a pilot randomised controlled trial. *BMJ open* 2015;5(11):e008634 doi: 10.1136/bmjopen-2015-008634 [published Online First: 24 November 2015].
25. Lee JS, Ahn S, Lee KH, et al. CONSORT 2010 Statement: Updated guidelines for reporting parallel group randomised trials. *Epidemiol Health* 2014 doi: 10.4178/epih/e2014029 [published Online First: 8 November 2014].
26. Rangan GK, Lee VW, Alexander SI, et al. KHA-CARI Autosomal Dominant Polycystic Kidney Disease Guideline: Screening for Polycystic Kidney Disease. *Semin Nephrol* 2015;35(6):557-64 e6 doi: 10.1016/j.semnephrol.2015.10.004 [published Online First: 22 December 2015].
27. Irazabal MV, Rangel LJ, Bergstralh EJ, et al. Imaging classification of autosomal dominant polycystic kidney disease: a simple model for selecting patients for clinical trials. *J Am Soc Nephrol* 2015;26(1):160-72 doi: 10.1681/ASN.2013101138 [published Online First: 5 June 2014].
28. Gul RB, Ali PA. Clinical trials: The challenge of recruitment and retention of participants. *J Clin Nurs* 2010;19(1-2):227-33 doi: 10.1111/j.1365-2702.2009.03041.x [published Online First: 17 December 2009].
29. Briel M, Olu KK, von Elm E, et al. A systematic review of discontinued trials suggested that most reasons for recruitment failure were preventable. *J Clin Epidemiol* 2016;80:8-15 doi: 10.1016/j.jclinepi.2016.07.016 [published Online First: 3 August 2016].
30. Mahon E, Roberts J, Furlong P, et al. Barriers to Clinical Trial Recruitment and Possible Solutions: A Stakeholder Survey. 2015.
31. Chapman AB, Torres VE, Perrone RD, et al. The HALT polycystic kidney disease trials: design and implementation. *Clin J Am Soc Nephrol* 2010;5(1):102-9 doi: 10.2215/cjn.04310709 [published Online First: 22 January 2010].
32. Cox P. Insensible water loss and its assessment in adult patients: a review. *Acta Anaesthesiol Scand* 1987;31(8):771-76 doi: 10.1111/j.1399-6576.1987.tb02662.x [published Online First: 30 December 2008].
33. Sawka MN, Chevront SN, Carter R. Human Water Needs. *Nutr Rev* 2005;63(Supplement 1):30-39 doi: 10.1301/nr.2005.jun.S30-S39 [published Online First: 28 June 2008].
34. Chevront SN, Kenefick RW. Am I Drinking Enough? Yes, No, and Maybe. *J Am Coll Nutr* 2016;35(2):185-92 doi: 10.1080/07315724.2015.1067872 [published Online First: 17 February 2016].
35. Frank M, De Vries A. Prevention of urolithiasis. Education to adequate fluid intake in a new town situated in the Judean Desert Mountains. *Arch Environ Health* 1966;13(5):625-30.

- 1
- 2
- 3 36. Borghi L, Meschi T, Amato F, et al. Urinary volume, water and recurrences in
- 4 idiopathic calcium nephrolithiasis: a 5-year randomized prospective study. *J*
- 5 *Urol* 1996;155(3):839-43.
- 6
- 7 37. O'Hara BJ, Phongsavan P, Venugopal K, et al. Effectiveness of Australia's Get
- 8 Healthy Information and Coaching Service(R): translational research with
- 9 population wide impact. *Prev Med* 2012;55(4):292-98 doi:
- 10 10.1016/j.ypmed.2012.07.022 [published Online First: 4 August 2012].
- 11
- 12 38. Chua TX, Prasad NS, Rangan GK, et al. A systematic review to determine the
- 13 most effective interventions to increase water intake. *Nephrology (Carlton)*
- 14 2016;21(10):860-69 doi: 10.1111/nep.12675 [published Online First: 12
- 15 September 2016].
- 16
- 17 39. Allman-Farinelli M, Partridge SR, McGeechan K, et al. A Mobile Health Lifestyle
- 18 Program for Prevention of Weight Gain in Young Adults (TXT2BFiT): Nine-
- 19 Month Outcomes of a Randomized Controlled Trial. *JMIR Mhealth Uhealth*
- 20 2016;4(2):408-19 doi: 10.2196/mhealth.5768 [published Online First: 22 June
- 21 2016].
- 22
- 23 40. Chapman AB, Bost JE, Torres VE, et al. Kidney volume and functional outcomes
- 24 in autosomal dominant polycystic kidney disease. *Clin J Am Soc Nephrol*
- 25 2012;7(3):479-86 doi: 10.2215/CJN.09500911 [published Online First:
- 26 February 2012].
- 27
- 28 41. Hunsley J, Hunsley J. Development of the Treatment Acceptability Questionnaire.
- 29 *Journal of Psychopathology and Behavioral Assessment* 1992;14(1):55-64
- 30 doi: 10.1007/BF00960091 [published Online First.
- 31
- 32 42. Kline TL, Edwards ME, Korfiatis P, et al. Semiautomated Segmentation of
- 33 Polycystic Kidneys in T2-Weighted MR Images. *AJR Am J Roentgenol*
- 34 2016;207(3):605-13 doi: 10.2214/AJR.15.15875 [published Online First:
- 35 September 2016].
- 36
- 37 43. Kline TL, Korfiatis P, Edwards ME, et al. Automatic total kidney volume
- 38 measurement on follow-up magnetic resonance images to facilitate monitoring
- 39 of autosomal dominant polycystic kidney disease progression. *Nephrol Dial*
- 40 *Transplant* 2016;31(2):241-48 doi: 10.1093/ndt/gfv314 [published Online
- 41 First: 31 August 2015].
- 42
- 43 44. Boertien WE, Meijer E, Zitteema D, et al. Copeptin, a surrogate marker for
- 44 vasopressin, is associated with kidney function decline in subjects with
- 45 autosomal dominant polycystic kidney disease. *Nephrol Dial Transplant*
- 46 2012;27(11):4131-37 doi: 10.1093/ndt/gfs070 [published Online First: 20
- 47 April 2012].
- 48
- 49 45. Bolignano D, Cabassi A, Fiaccadori E, et al. Copeptin (CTproAVP), a new tool
- 50 for understanding the role of vasopressin in pathophysiology. *Clin Chem Lab*
- 51 *Med* 2014;52(10):1447-56 doi: 10.1515/cclm-2014-0379 [published Online
- 52 First: 18 June 2014].
- 53
- 54 46. Kush R, Goldman M. Fostering responsible data sharing through standards. *N*
- 55 *Engl J Med* 2014;370(23):2163-65 doi: 10.1056/NEJMp1401444 [published
- 56 Online First: 5 June 2014].
- 57
- 58 47. Partridge SR, Allman-Farinelli M, McGeechan K, et al. Process evaluation of
- 59 TXT2BFiT: a multi-component mHealth randomised controlled trial to
- 60 prevent weight gain in young adults. *Int J Behav Nutr Phys Act* 2016;13(1):7
- doi: 10.1186/s12966-016-0329-2 [published Online First: 19 January 2016].

- 1  
2  
3 48. Good M, Schuler L. Subject retention in a controlled clinical trial. *J Adv Nurs*  
4 1997;26(2):351-55 doi: 10.1046/j.1365-2648.1997.1997026351.x [published  
5 Online First: 28 June 2008].  
6  
7 49. Gansevoort RT, Arici M, Benzing T, et al. Recommendations for the use of  
8 tolvaptan in autosomal dominant polycystic kidney disease: a position  
9 statement on behalf of the ERA-EDTA Working Groups on Inherited Kidney  
10 Disorders and European Renal Best Practice. *Nephrol Dial Transplant*  
11 2016;31(3):337-48 doi: 10.1093/ndt/gfv456 [published Online First: 29  
12 January 2016].  
13 50. Knowler WC, Barrett-Connor E, Fowler SE, et al. Reduction in the Incidence of  
14 Type 2 Diabetes with Lifestyle Intervention or Metformin. *N Engl J Med*  
15 2002;346(6):393-403 doi: 10.1056/NEJMoa012512 [published Online First: 7  
16 February 2002].  
17 51. Ruggenti P, Gaspari F, Cannata A, et al. Measuring and estimating GFR and  
18 treatment effect in ADPKD patients: Results and implications of a  
19 longitudinal cohort study. *PLoS ONE* 2012;7(2):e32533 doi:  
20 10.1371/journal.pone.0032533 [published Online First.  
21  
22 52. McCauley LR, Dyer AJ, Stern K, et al. Factors influencing fluid intake behavior  
23 among kidney stone formers. *J Urol* 2012;187(4):1282-86 doi:  
24 10.1016/j.juro.2011.11.111 [published Online First: 15 February 2012].  
25 53. Erickson KF, Chertow GM, Goldhaber-Fiebert JD. Cost-effectiveness of tolvaptan  
26 in autosomal dominant polycystic kidney disease. *Ann Intern Med*  
27 2013;159(6):382-89 doi: 10.7326/0003-4819-159-6-201309170-00004  
28 [published Online First: 17 September 2013].  
29  
30  
31

32 **Figure 1:** Schema of the PREVENT-ADPKD Trial Design. (adapted from Ref. [10])  
33  
34  
35  
36  
37  
38  
39  
40  
41  
42  
43  
44  
45  
46  
47  
48  
49  
50  
51  
52  
53  
54  
55  
56  
57  
58  
59  
60

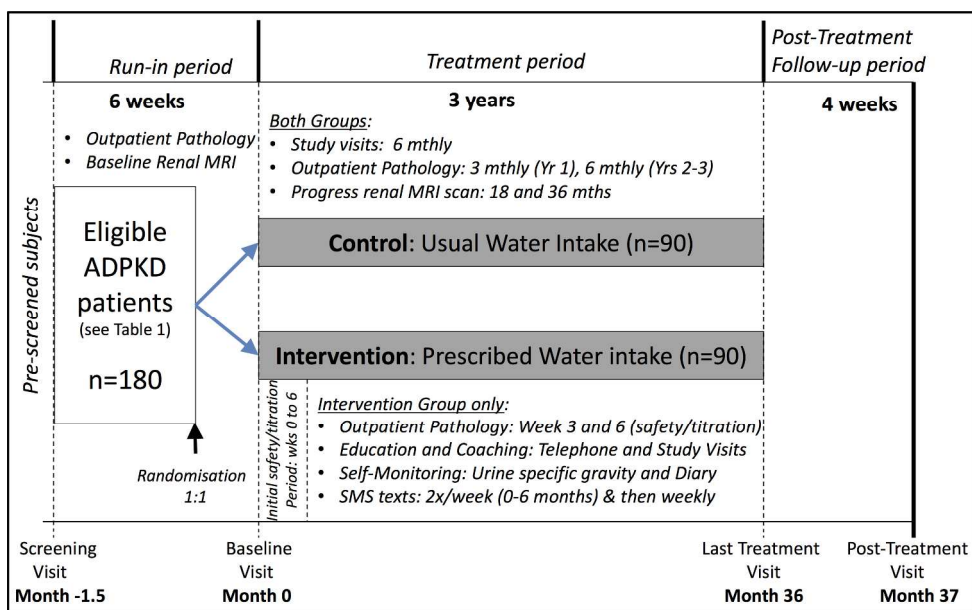

Figure 1: Schema of the PREVENT-ADPKD Trial Design. (adapted from Ref. [10])

249x160mm (300 x 300 DPI)



## CONSORT 2010 checklist of information to include when reporting a randomised trial\*

| Section/Topic                    | Item No | Checklist item                                                                                                                                                                              | Reported on page No |
|----------------------------------|---------|---------------------------------------------------------------------------------------------------------------------------------------------------------------------------------------------|---------------------|
| <b>Title and abstract</b>        |         |                                                                                                                                                                                             |                     |
|                                  | 1a      | Identification as a randomised trial in the title                                                                                                                                           | 1                   |
|                                  | 1b      | Structured summary of trial design, methods, results, and conclusions (for specific guidance see CONSORT for abstracts)                                                                     | 3                   |
| <b>Introduction</b>              |         |                                                                                                                                                                                             |                     |
| Background and objectives        | 2a      | Scientific background and explanation of rationale                                                                                                                                          | 5                   |
|                                  | 2b      | Specific objectives or hypotheses                                                                                                                                                           | 7                   |
| <b>Methods</b>                   |         |                                                                                                                                                                                             |                     |
| Trial design                     | 3a      | Description of trial design (such as parallel, factorial) including allocation ratio                                                                                                        | 7                   |
|                                  | 3b      | Important changes to methods after trial commencement (such as eligibility criteria), with reasons                                                                                          | N/A                 |
| Participants                     | 4a      | Eligibility criteria for participants                                                                                                                                                       | 8                   |
|                                  | 4b      | Settings and locations where the data were collected                                                                                                                                        | 9                   |
| Interventions                    | 5       | The interventions for each group with sufficient details to allow replication, including how and when they were actually administered                                                       | 12                  |
| Outcomes                         | 6a      | Completely defined pre-specified primary and secondary outcome measures, including how and when they were assessed                                                                          | 16                  |
|                                  | 6b      | Any changes to trial outcomes after the trial commenced, with reasons                                                                                                                       | N/A                 |
| Sample size                      | 7a      | How sample size was determined                                                                                                                                                              | 24                  |
|                                  | 7b      | When applicable, explanation of any interim analyses and stopping guidelines                                                                                                                | N/A                 |
| <b>Randomisation:</b>            |         |                                                                                                                                                                                             |                     |
| Sequence generation              | 8a      | Method used to generate the random allocation sequence                                                                                                                                      | 12                  |
|                                  | 8b      | Type of randomisation; details of any restriction (such as blocking and block size)                                                                                                         | 12                  |
| Allocation concealment mechanism | 9       | Mechanism used to implement the random allocation sequence (such as sequentially numbered containers), describing any steps taken to conceal the sequence until interventions were assigned | 12                  |
| Implementation                   | 10      | Who generated the random allocation sequence, who enrolled participants, and who assigned participants to interventions                                                                     | 12                  |
| Blinding                         | 11a     | If done, who was blinded after assignment to interventions (for example, participants, care providers, those                                                                                | N/A                 |



|                                                      |     |                                                                                                                                                   |     |
|------------------------------------------------------|-----|---------------------------------------------------------------------------------------------------------------------------------------------------|-----|
|                                                      |     | assessing outcomes) and how                                                                                                                       |     |
|                                                      | 11b | If relevant, description of the similarity of interventions                                                                                       | 15  |
| Statistical methods                                  | 12a | Statistical methods used to compare groups for primary and secondary outcomes                                                                     | 25  |
|                                                      | 12b | Methods for additional analyses, such as subgroup analyses and adjusted analyses                                                                  | N/A |
| <b>Results</b>                                       |     |                                                                                                                                                   |     |
| Participant flow (a diagram is strongly recommended) | 13a | For each group, the numbers of participants who were randomly assigned, received intended treatment, and were analysed for the primary outcome    | N/A |
|                                                      | 13b | For each group, losses and exclusions after randomisation, together with reasons                                                                  | N/A |
| Recruitment                                          | 14a | Dates defining the periods of recruitment and follow-up                                                                                           | 29  |
|                                                      | 14b | Why the trial ended or was stopped                                                                                                                | N/A |
| Baseline data                                        | 15  | A table showing baseline demographic and clinical characteristics for each group                                                                  | N/A |
| Numbers analysed                                     | 16  | For each group, number of participants (denominator) included in each analysis and whether the analysis was by original assigned groups           | N/A |
| Outcomes and estimation                              | 17a | For each primary and secondary outcome, results for each group, and the estimated effect size and its precision (such as 95% confidence interval) | N/A |
|                                                      | 17b | For binary outcomes, presentation of both absolute and relative effect sizes is recommended                                                       | N/A |
| Ancillary analyses                                   | 18  | Results of any other analyses performed, including subgroup analyses and adjusted analyses, distinguishing pre-specified from exploratory         | N/A |
| Harms                                                | 19  | All important harms or unintended effects in each group (for specific guidance see CONSORT for harms)                                             | N/A |
| <b>Discussion</b>                                    |     |                                                                                                                                                   |     |
| Limitations                                          | 20  | Trial limitations, addressing sources of potential bias, imprecision, and, if relevant, multiplicity of analyses                                  | 24  |
| Generalisability                                     | 21  | Generalisability (external validity, applicability) of the trial findings                                                                         | 29  |
| Interpretation                                       | 22  | Interpretation consistent with results, balancing benefits and harms, and considering other relevant evidence                                     | N/A |
| <b>Other information</b>                             |     |                                                                                                                                                   |     |
| Registration                                         | 23  | Registration number and name of trial registry                                                                                                    | 7   |
| Protocol                                             | 24  | Where the full trial protocol can be accessed, if available                                                                                       | N/A |
| Funding                                              | 25  | Sources of funding and other support (such as supply of drugs), role of funders                                                                   | 31  |

\*We strongly recommend reading this statement in conjunction with the CONSORT 2010 Explanation and Elaboration for important clarifications on all the items. If relevant, we also recommend reading CONSORT extensions for cluster randomised trials, non-inferiority and equivalence trials, non-pharmacological treatments, herbal interventions, and pragmatic trials. Additional extensions are forthcoming: for those and for up to date references relevant to this checklist, see [www.consort-statement.org](http://www.consort-statement.org).
